# Supplementary material
Source: Royal Society of Chemistry journal article supplement (doi:10.1039/d6gc00247a)
Supplement: d6gc00247a1.pdf [file d6gc00247a1.pdf]

## Supporting information

### Computation-aided redesign of C-glycosyltransferases facilitates sustainable biosynthesis of C-glycosides

Xinhe Liu<sup>a</sup>, Jialin Li<sup>a</sup>, Wenrui Zhao<sup>a</sup>, Xuesong Gong<sup>a</sup>, Qiuyan Sun<sup>a</sup>, Xudong Feng<sup>a\*</sup>

and Chun Li<sup>b, c, d, e\*</sup>

<sup>a</sup>Key Laboratory of Medical Molecule Science and Pharmaceutical Engineering, Ministry of Industry and Information Technology, Institute of Biochemical Engineering, School of Chemistry and Chemical Engineering, Beijing Institute of Technology, Beijing 100081, China

<sup>b</sup>Key Lab for Industrial Biocatalysis, Ministry of Education, Department of Chemical Engineering, Tsinghua University, Beijing 100084, China

<sup>c</sup>Center for Synthetic and Systems Biology, Tsinghua University, Beijing 100084, China

<sup>d</sup>Beijing Key Laboratory of Recombinant Protein Synthetic Biomanufacturing, Beijing 100084, China

<sup>e</sup>State Key Laboratory of Green Biomanufacturing, Beijing 100084, China

\*Correspondence to Xudong Feng (xd.feng@bit.edu.cn), Chun Li (lichun@tsinghua.edu.cn)

## Supplementary Figures

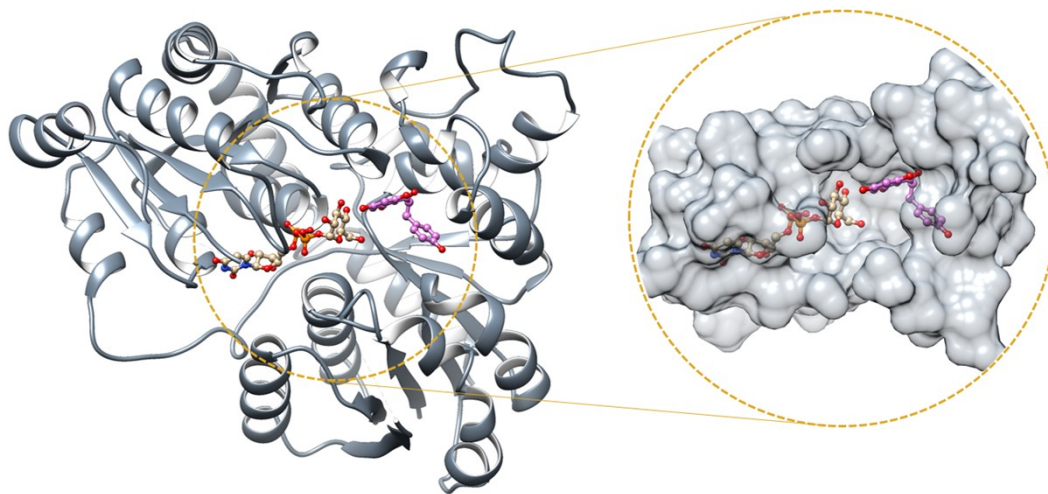

**Fig. S1** Active pocket in the protein structure of UGT708B4 WT (PDB ID: 6L5P). Protein is represented as the grey ribbon. UDP-Glc is represented as the light gold stick. Phloretin is represented as the orchid stick.

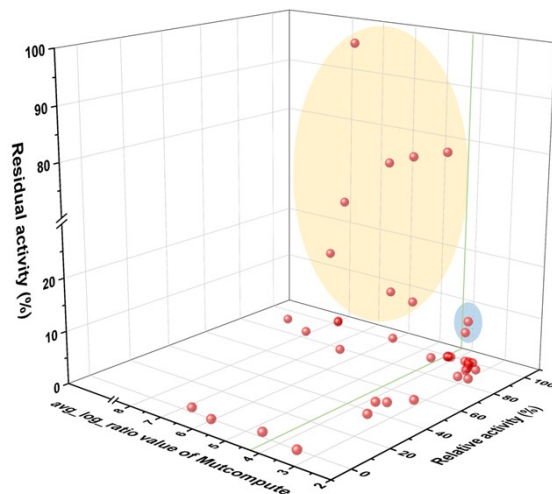

**Fig. S2** Statistical analysis of mutant prediction and thermostability classification. Mutant predictions were based on avg\_log\_ratio values calculated using MutCompute. Experimental characterization included measurements of relative activity and residual activity. Red dots represent experimentally characterized mutants. The green line indicates the boundary between the high-score group (19 mutants) and the low-score group (19 mutants), defined by an avg\_log\_ratio threshold of 4.24. The yellow and blue regions represent mutants with improved thermostability in the high-score group (8 mutants) and the low-score group (2 mutants), respectively.

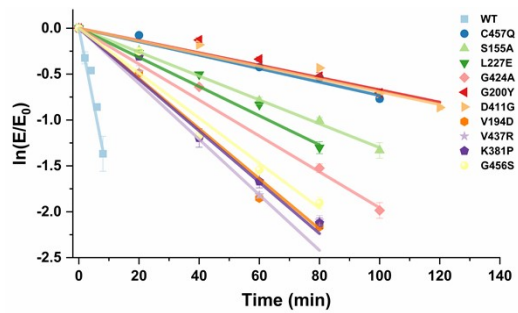

**Fig. S3** The first-order kinetics fitting of thermal deactivation of UGT708B4 WT and mutants C457Q, G424A, L227E, S155A, G200Y, D411G, V194D, V437R, K381P and G456S at 50 °C. Error bars represent the mean  $\pm$  standard deviation (n=3).

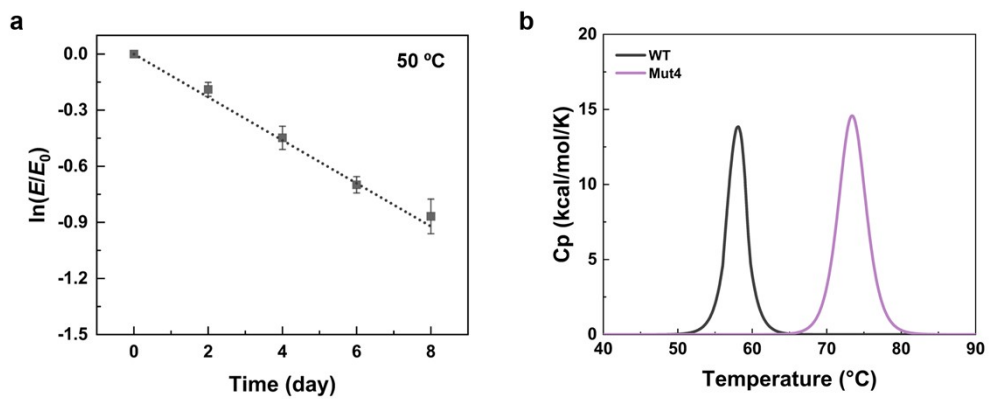

**Fig. S4** Thermostability characterization of Mut4. (a) The first-order kinetics fitting of thermal deactivation at 50 °C. (b) DSC scanning curve. Error bars represent the mean  $\pm$  standard deviation ( $n=3$ ).

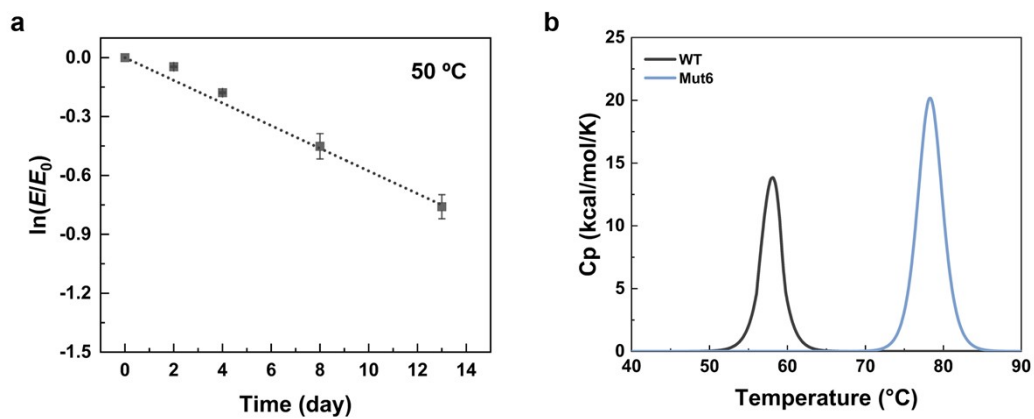

**Fig. S5** Thermostability characterization of Mut6. (a) The first-order kinetics fitting of thermal deactivation at 50 °C. (b) DSC scanning curve. Error bars represent the mean  $\pm$  standard deviation ( $n=3$ ).

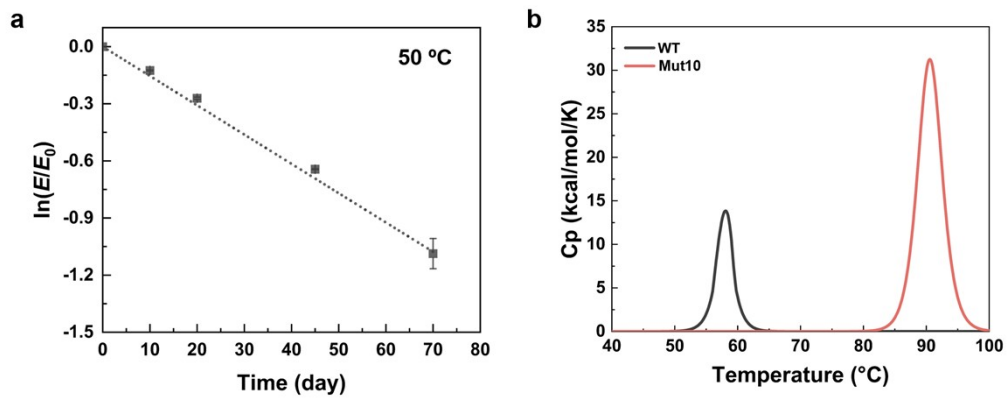

**Fig. S6** Thermostability characterization of Mut10. (a) The first-order kinetics fitting of thermal deactivation at 50 °C. (b) DSC scanning curve. Error bars represent the mean  $\pm$  standard deviation ( $n=3$ ).

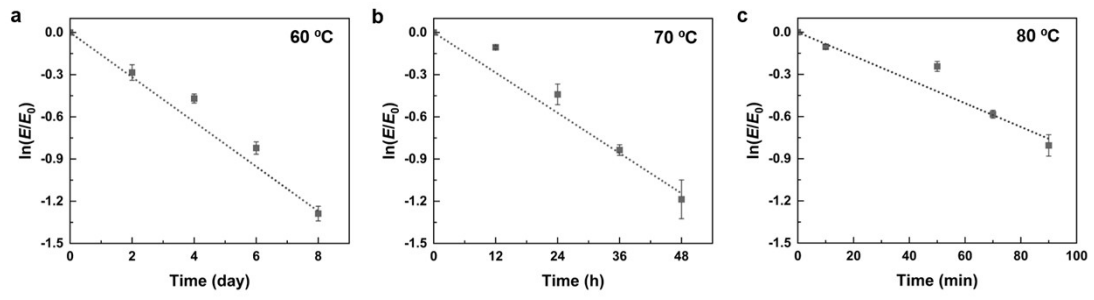

**Fig. S7** The first-order kinetics fitting of thermal deactivation of Mut10 at 60 °C (a), 70 °C (b) and 80 °C (c). Error bars represent the mean  $\pm$  standard deviation (n=3).

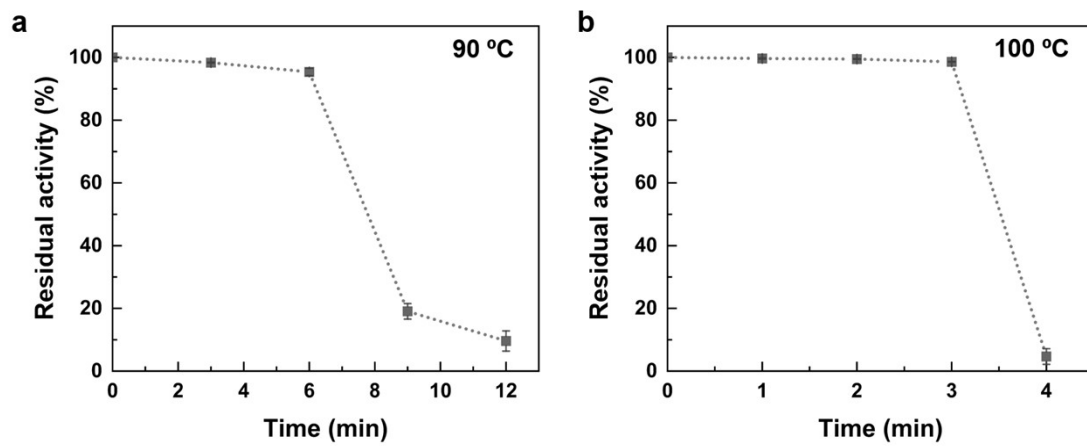

**Fig. S8** Thermostability of Mut10 at 90 °C (a) and 100 °C (b). Error bars represent the mean  $\pm$  standard deviation (n=3).

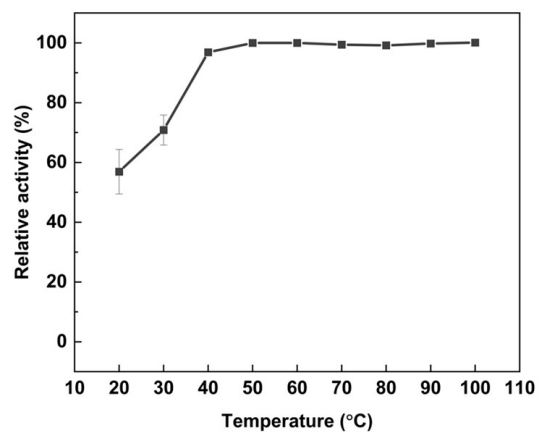

**Fig. S9** Temperature profile of Mut10. Error bars represent the mean  $\pm$  standard deviation (n=3).

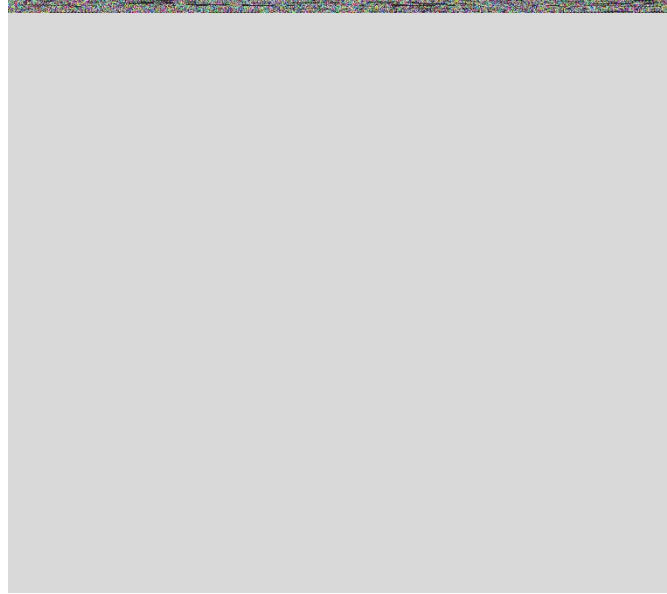

**Fig. S10** pH profile of Mut10. Different reaction buffers: pH 3.0–6.0 (citric acid-sodium citrate buffer), pH 6.0–8.0 ( $\text{Na}_2\text{HPO}_4\text{-NaH}_2\text{PO}_4$  buffer), pH 8.0–9.0 (Tirs-HCl buffer), and pH 10.0–11.0 ( $\text{Na}_2\text{CO}_3\text{-NaHCO}_3$  buffer). Error bars represent the mean  $\pm$  standard deviation (n=3).

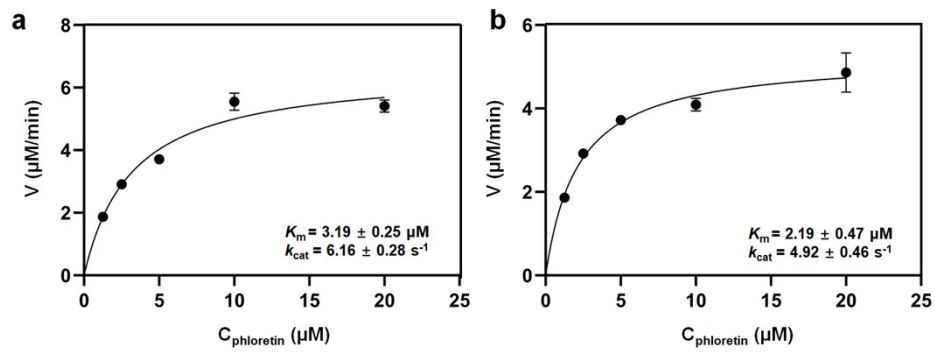

**Fig. S11** Michaelis-Menten kinetics of WT (a) and Mut10 (b). Error bars represent the mean  $\pm$  standard deviation ( $n=3$ ).

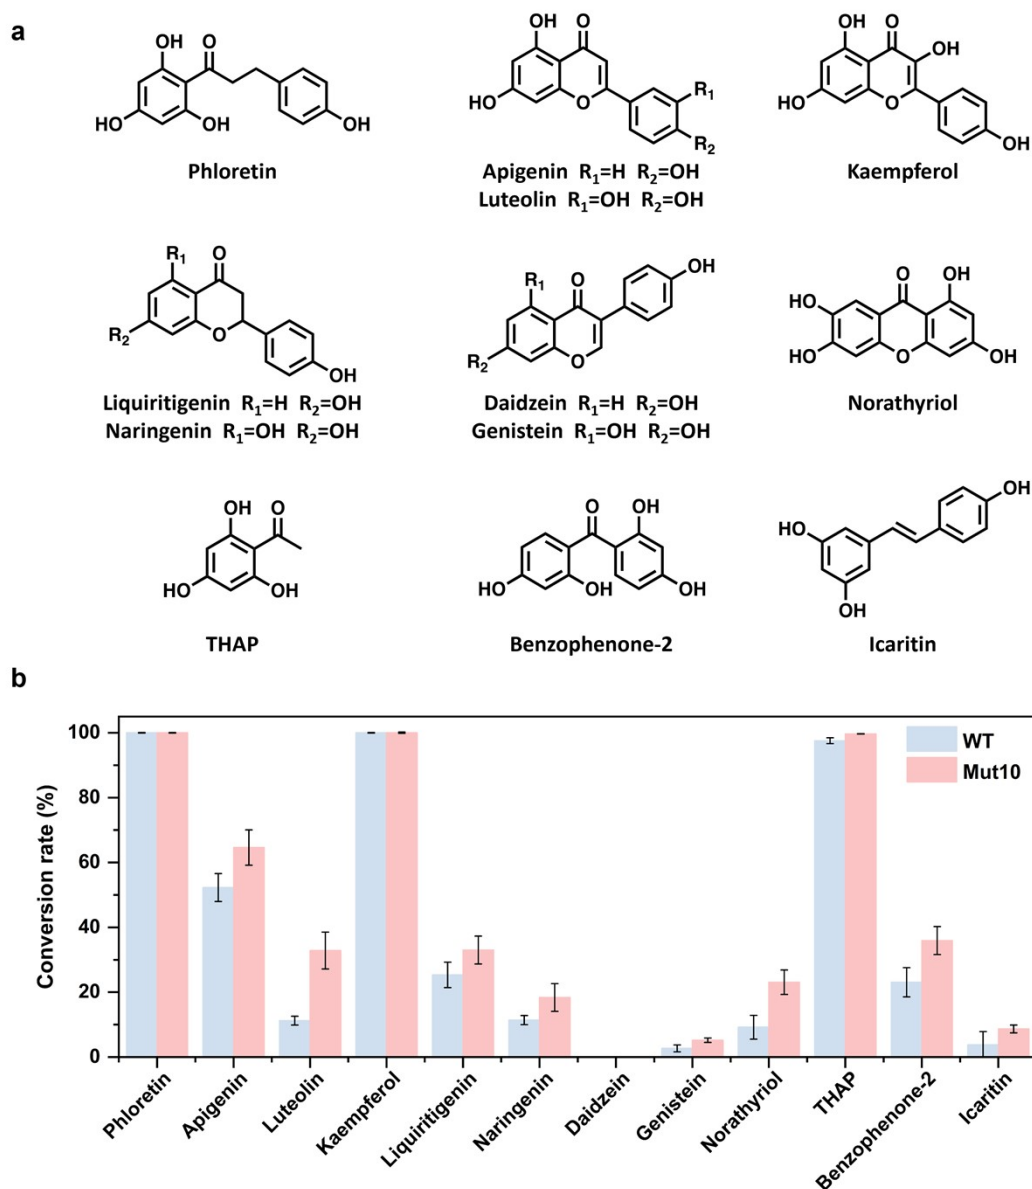

**Fig. S12** Substrate scope characterization. (a) Chemical structures of compounds used as sugar acceptors. (b) Substrate scope of WT and Mut10. UDP-Glc was used as the sugar donor. Error bars represent the mean  $\pm$  standard deviation ( $n=3$ ).

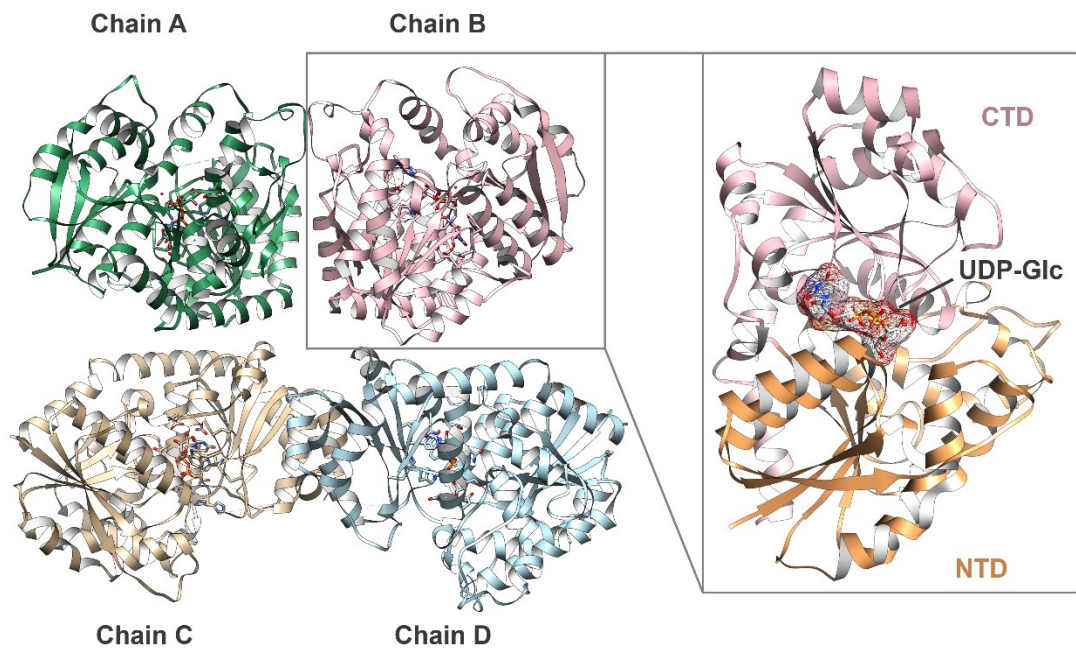

**Fig. S13** The crystal structure of Mut10. Each asymmetric unit of Mut10 contained four chains.

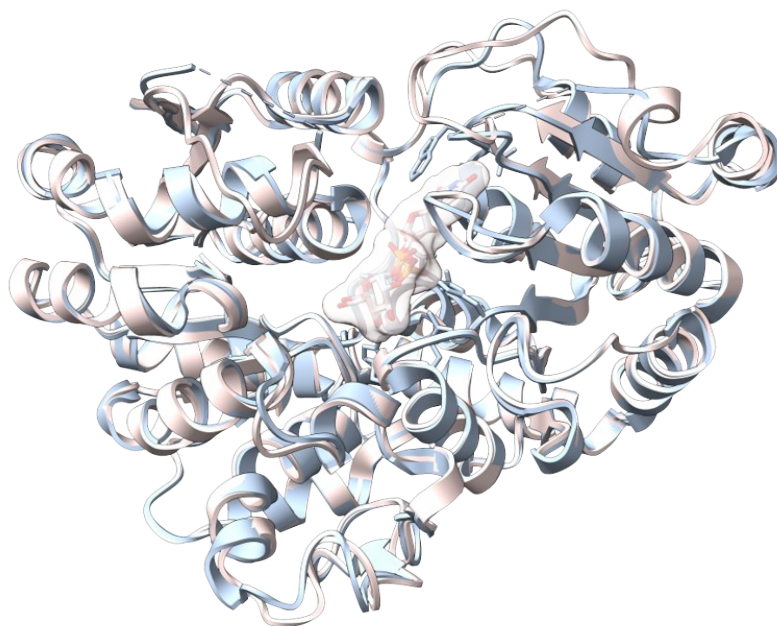

**Fig. S14** Structure superposition of WT (blue) and Mut10 (pink). The protein is represented as the ribbon in different colors. UDP-Glc is represented as the stick with surface.

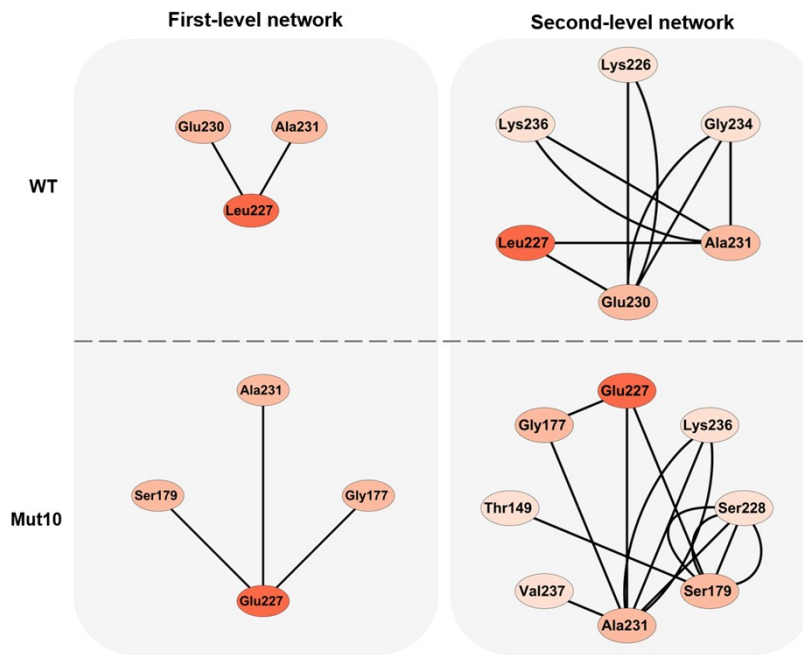

**Fig. S15** The first-level network and second-level network based on node 227 in WT and Mut10.

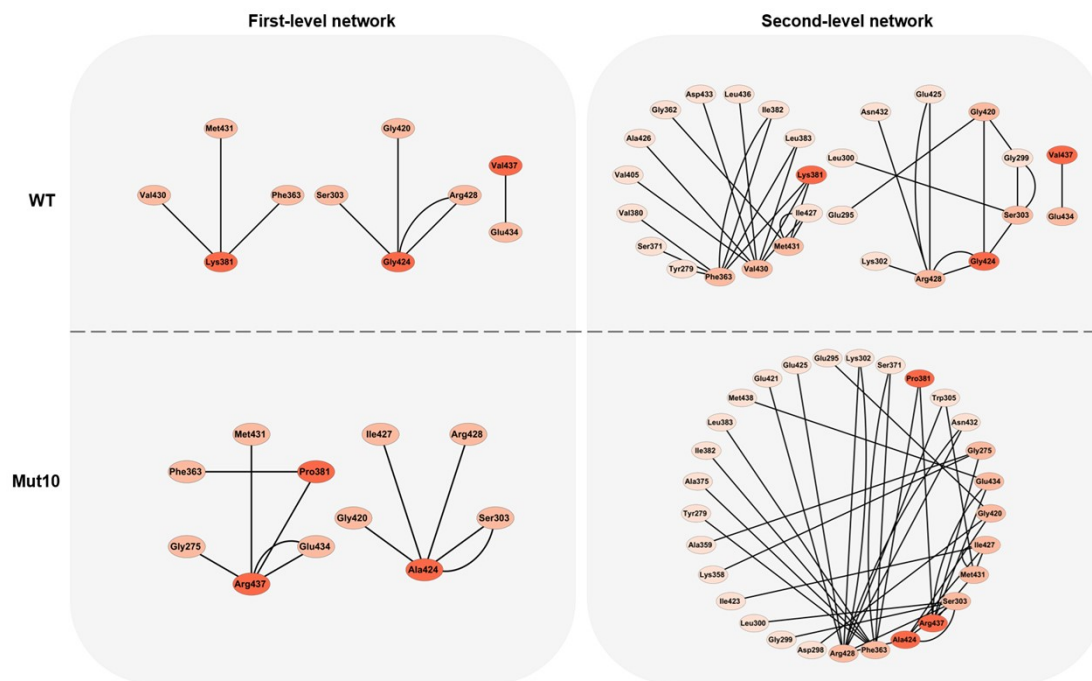

**Fig. S16** The first-level network and second-level network based on node 381, 424 and 437 in WT and Mut10.

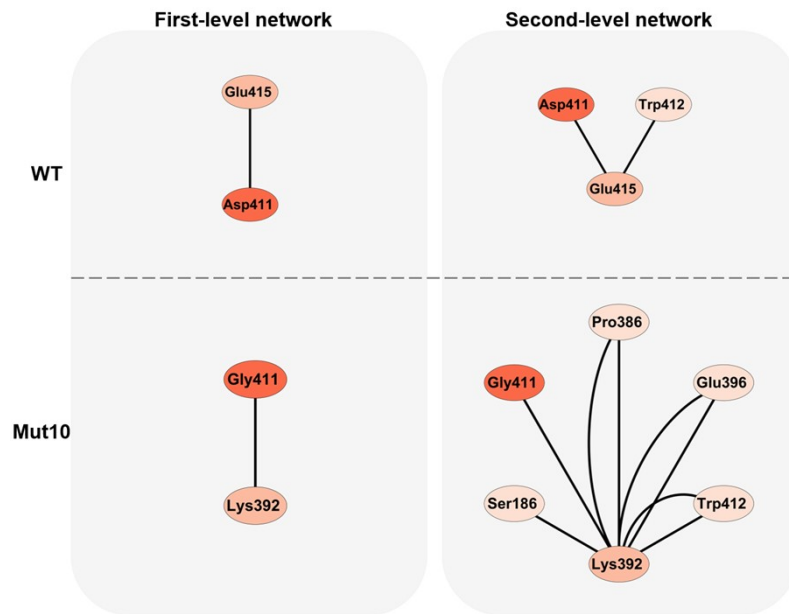

**Fig. S17** The first-level network and second-level network based on node 411 in WT and Mut10.

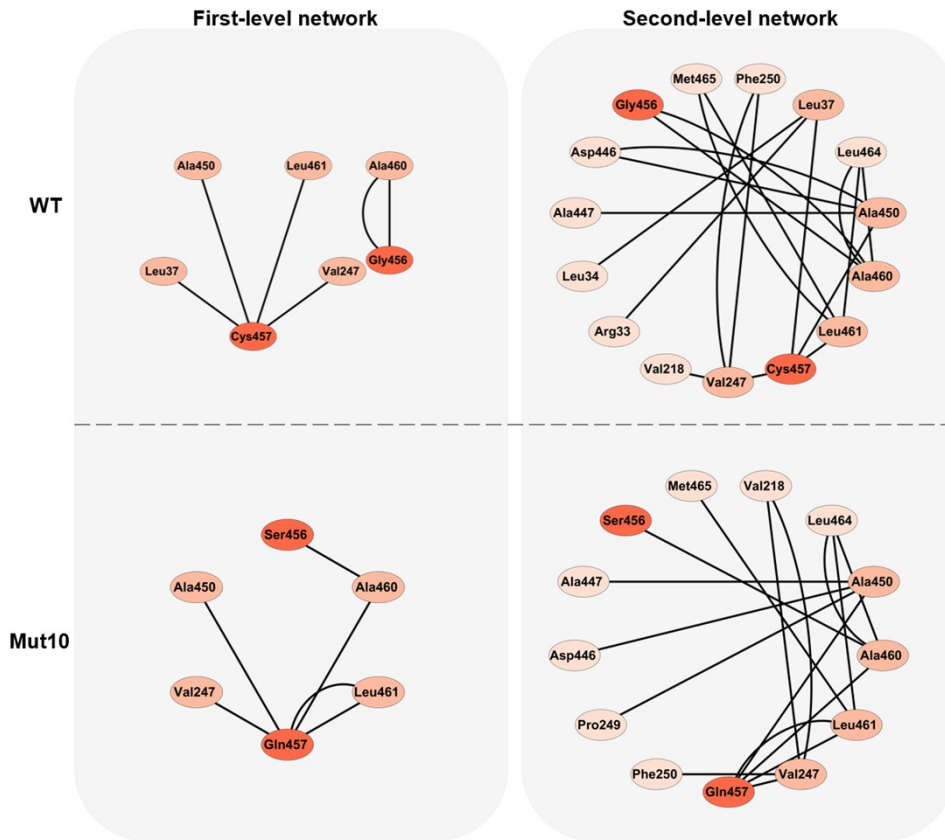

**Fig. S18** The first-level network and second-level network based on node 456 and 457 in WT and Mut10.

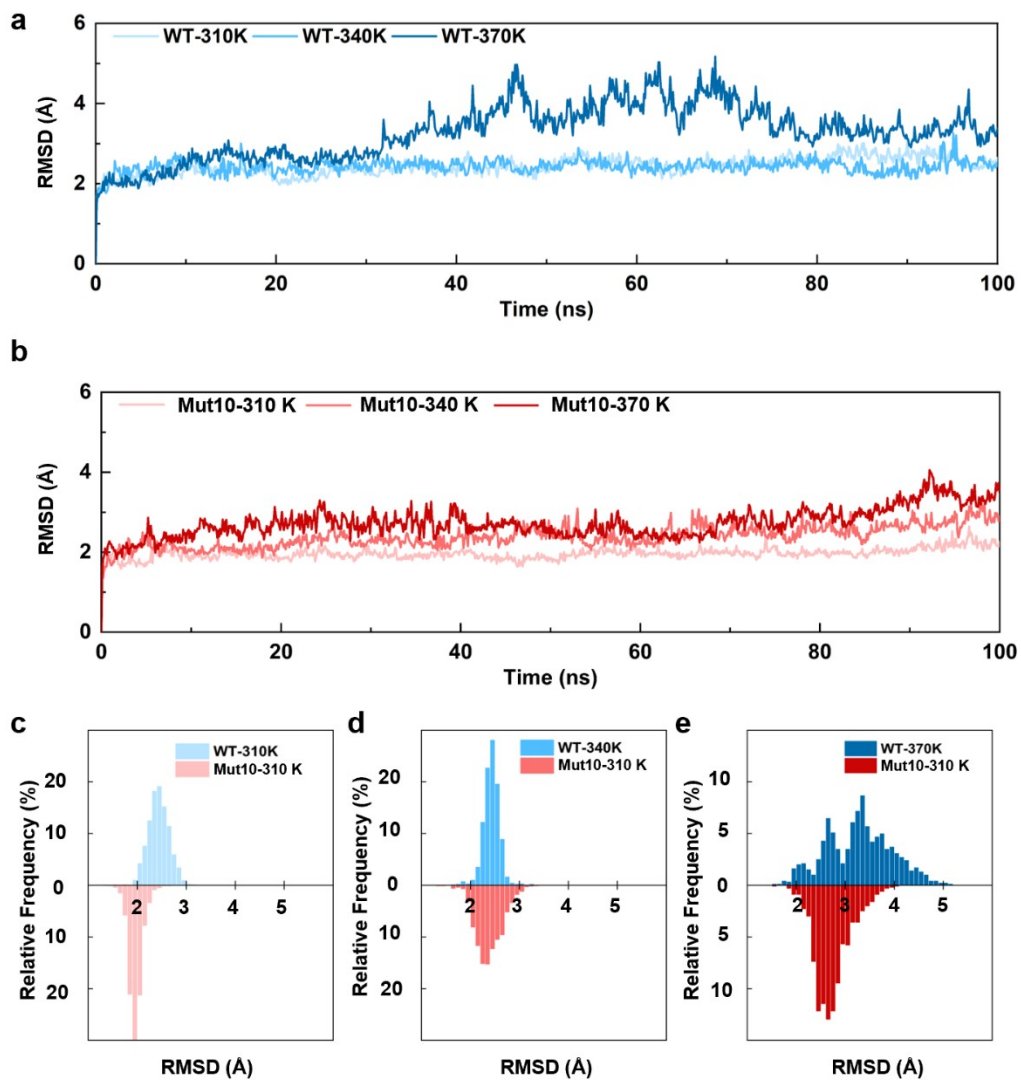

**Fig. S19** RMSD analysis based on 100 ns MD simulation. RMSD of WT (a) and Mut10 (b) at different temperatures. Relative frequency histograms of RMSD value of WT and Mut10 at 310 K (c), 340 K (d) and 370 K (e).

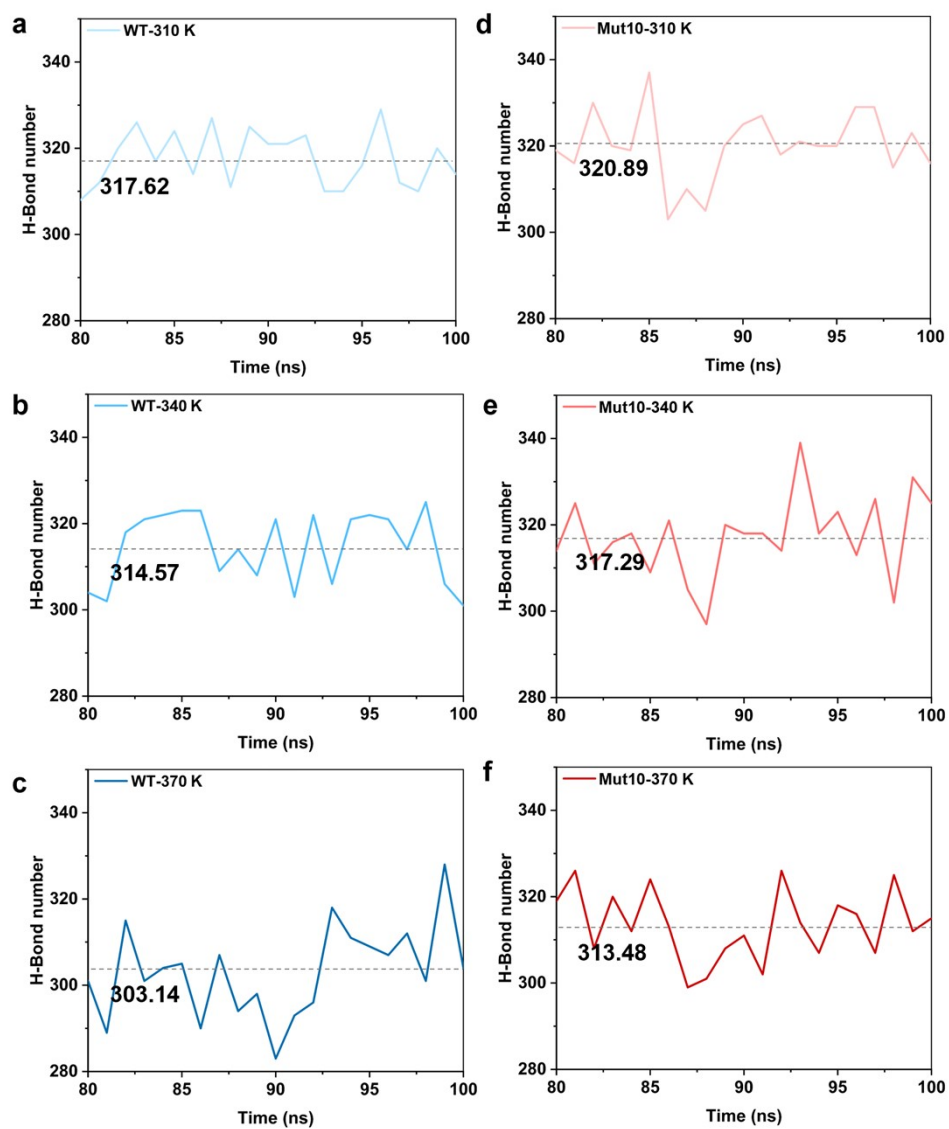

**Fig. S20** Overall hydrogen bonds analysis in WT (a–c) and Mut10 (d–f) over the final 20 ns of MD simulations. Overall hydrogen bonds analysis of WT at 310 K (a), 340 K (b) and 370 K (c). Overall hydrogen bonds analysis of Mut10 at 310 K (d), 340 K (e) and 370 K (f).

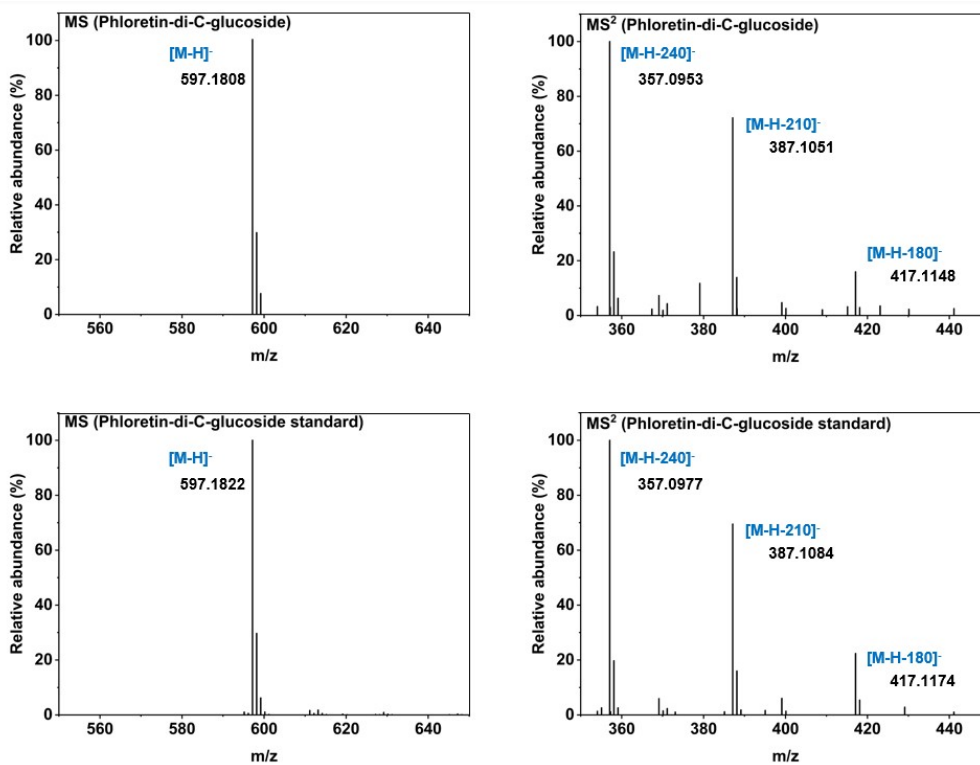

**Fig. S21** LC-MS/MS analysis of the product phloretin di-C-glucoside and the standard.

## Supplementary Tables

**Table S1** The residues constituting the active pocket of UGT708B4 WT analyzed by ProteinPlus.

| Residues                                                                                                                                                                                                                                                                                           |
|----------------------------------------------------------------------------------------------------------------------------------------------------------------------------------------------------------------------------------------------------------------------------------------------------|
| Gly24–His27, Thr29, Pro30, Arg33, Phe92, Phe95, Arg99,<br>Met123–Leu125, Phe144–Ser146, Met150, Phe153, Phe154,<br>Pro189–Leu192, Leu198, Phe199, Leu202, Phe203, Asp206, Glu256,<br>Tyr279, Ser281–Thr286, Val310, Lys312, Glu347–Ser352, Leu355,<br>Ser365–Val372, Glu374, His388–Gln391, Asn394 |

**Table S2** Mutations predicted by MutCompute.

| Mutants | avg_log_ratio | Mutants | avg_log_ratio |
|---------|---------------|---------|---------------|
| Q51V    | 14.07         | S22N    | 4.22          |
| E415V   | 8.06          | S36A    | 4.16          |
| K211P   | 7.95          | D350Q   | 4.08          |
| K346N   | 7.81          | D446S   | 3.84          |
| V180P   | 7.66          | L129M   | 3.75          |
| V259P   | 7.61          | L104N   | 3.73          |
| C457Q   | 7.34          | S181D   | 3.63          |
| S284T   | 7.04          | R290K   | 3.62          |
| V459Q   | 6.86          | S187C   | 3.59          |
| E458K   | 6.49          | T49V    | 3.57          |
| G424A   | 6.21          | T441S   | 3.54          |
| S97A    | 6.11          | M438E   | 3.52          |
| F172V   | 6.06          | E267K   | 3.52          |
| S163D   | 6.01          | S165D   | 3.51          |
| L227E   | 5.48          | S111N   | 3.50          |
| F330E   | 5.40          | S102A   | 3.41          |
| K312F   | 5.15          | K201S   | 3.36          |
| T264A   | 4.70          | T106L   | 3.28          |
| D313A   | 4.51          | C43N    | 3.22          |
| S155A   | 4.44          | V238T   | 3.20          |
| S274A   | 4.25          | N370Q   | 3.10          |
| H40E    | 4.24          | E353L   | 3.01          |

**Table S3**  $t_{1/2}$  of mutants (50 °C).

| Mutants | $k_d$                               | $t_{1/2}$                     | Fold                  |
|---------|-------------------------------------|-------------------------------|-----------------------|
| WT      | $0.156 \pm 0.0149 \text{ min}^{-1}$ | $4.48 \pm 0.40 \text{ min}$   | /                     |
| C457Q   | $0.007 \pm 0.0002 \text{ min}^{-1}$ | $94.14 \pm 2.15 \text{ min}$  | $21.15 \pm 1.57$      |
| S155A   | $0.013 \pm 0.0003 \text{ min}^{-1}$ | $53.76 \pm 1.21 \text{ min}$  | $12.12 \pm 1.36$      |
| L227E   | $0.015 \pm 0.0005 \text{ min}^{-1}$ | $46.37 \pm 1.66 \text{ min}$  | $10.45 \pm 1.17$      |
| G424A   | $0.019 \pm 0.0006 \text{ min}^{-1}$ | $36.19 \pm 1.07 \text{ min}$  | $8.14 \pm 0.66$       |
| G200Y   | $0.006 \pm 0.0001 \text{ min}^{-1}$ | $108.31 \pm 1.38 \text{ min}$ | $24.39 \pm 2.39$      |
| D411G   | $0.007 \pm 0.0001 \text{ min}^{-1}$ | $104.00 \pm 1.96 \text{ min}$ | $23.42 \pm 2.25$      |
| V194D   | $0.028 \pm 0.0005 \text{ min}^{-1}$ | $24.59 \pm 0.43 \text{ min}$  | $5.54 \pm 0.59$       |
| V437R   | $0.028 \pm 0.0004 \text{ min}^{-1}$ | $24.64 \pm 0.36 \text{ min}$  | $5.56 \pm 0.61$       |
| K381P   | $0.028 \pm 0.0009 \text{ min}^{-1}$ | $25.23 \pm 0.82 \text{ min}$  | $5.69 \pm 0.67$       |
| G456S   | $0.025 \pm 0.0007 \text{ min}^{-1}$ | $28.04 \pm 0.77 \text{ min}$  | $6.31 \pm 0.58$       |
| Mut4    | $0.111 \pm 0.0039 \text{ d}^{-1}$   | $6.26 \pm 0.22 \text{ d}$     | $2022.83 \pm 129.38$  |
| Mut6    | $0.056 \pm 0.0044 \text{ d}^{-1}$   | $12.35 \pm 0.91 \text{ d}$    | $4011.73 \pm 156.06$  |
| Mut10   | $0.015 \pm 0.0007 \text{ d}^{-1}$   | $46.22 \pm 2.33 \text{ d}$    | $15057.12 \pm 433.70$ |

**Table S4** The energy value of mutants predicted by FireProt.

| Mutants | FoldX (kcal/mol) | Rosetta (kcal/mol) |
|---------|------------------|--------------------|
| E339L   | -1.00            | -17.34             |
| V467M   | -1.04            | -7.65              |
| G200W   | -2.16            | -7.44              |
| G246P   | -2.01            | -7.26              |
| C253F   | -2.05            | -5.06              |
| S179F   | -1.62            | -4.95              |
| T49V    | -1.14            | -3.4               |
| S207A   | -1.61            | -3.4               |
| T106Y   | -1.85            | -3.08              |
| D411G   | -1.62            | -2.99              |
| F330P   | -1.42            | -2.88              |
| Q51I    | -1.67            | -2.54              |
| S274P   | -1.23            | -2.48              |
| S110L   | -1.59            | -2.48              |
| T53P    | -1.96            | -2.2               |
| V333W   | -2.07            | -2.08              |

**Table S5** Mutations predicted by PROSS.

| Mutants |       |         |       |
|---------|-------|---------|-------|
| V437R   | K445E | V194N   | G424A |
| T106A/H | K381P | S36A/V  | D206N |
| S207A   | G456S | S155A/L | V430M |
| S118A   | G409E | S102A   | V218I |
| S100A   | G289S | M438E   | H140C |
| P191L/F | G200Y | E59S    | S197H |
| P128C/T | D446E | V459K   | H44Q  |
| L227E/R | D411G | K358P   | G223A |
| L20F    | P208R | H214D   | V296L |

**Table S6** Mutations predicted by Consensus Finder.

| Mutants | Score (%) | Mutants | Score (%) | Mutants | Score (%) |
|---------|-----------|---------|-----------|---------|-----------|
| C457S   | 88        | V194D   | 61        | N432E   | 39        |
| K381P   | 86        | M336T   | 59        | S352V   | 37        |
| F250L   | 78        | A399E   | 59        | M438E   | 35        |
| S118A   | 77        | A319E   | 55        | M465I   | 35        |
| V301E   | 76        | W403L   | 54        | K169L   | 33        |
| V437R   | 74        | K445E   | 54        | G246C   | 33        |
| G384A   | 74        | V373L   | 52        | W305Q   | 33        |
| G456S   | 74        | V296I   | 51        | L227E   | 31        |
| G289S   | 71        | E339K   | 48        | V467S   | 31        |
| I224L   | 70        | K226P   | 48        | G326E   | 30        |
| S266L   | 67        | D411G   | 45        | K407V   | 29        |
| P80L    | 66        | F330E   | 45        | H214D   | 28        |
| V333L   | 66        | E59S    | 44        | E164T   | 26        |
| V337K   | 62        | S100R   | 41        | G200T   | 25        |
| A96E    | 62        | D446E   | 41        | H140T   | 20        |

**Table S7** Crystallographic data collection and refinement statistics for Mut10/UDP-Glc (PDB ID: 8ZNM).

| Parameters                          | Mut10/UDP-Glc           |
|-------------------------------------|-------------------------|
| <b>Data collection</b>              |                         |
| Wavelength                          | 0.97915                 |
| Space group                         | P 1                     |
| Cell dimensions                     |                         |
| <i>a, b, c</i> (Å)                  | 75.618, 81.849, 94.141  |
| $\alpha, \beta, \gamma$ (°)         | 64.760, 88.281, 88.244  |
| Resolution (Å)                      | 29.64–2.21 (2.289–2.21) |
| $R_{\text{merge}}$                  | 0.05923 (0.4958)        |
| $I / \sigma I$                      | 7.54 (2.65)             |
| Completeness (%)                    | 96.75 (97.15)           |
| Redundancy                          | 3.5 (3.4)               |
| <b>Refinement</b>                   |                         |
| No. reflections (overall)           | 98868 (9933)            |
| No. reflections (test set)          | 5169 (508)              |
| $R_{\text{work}} / R_{\text{free}}$ | 0.1764 / 0.2174         |
| No. atoms                           |                         |
| Macromolecules                      | 14045                   |
| Ligand                              | 144                     |
| Solvent                             | 528                     |
| $B$ -factor                         |                         |
| Macromolecules (Å <sup>2</sup> )    | 52.97                   |
| Ligand (Å <sup>2</sup> )            | 49.48                   |
| Solvent (Å <sup>2</sup> )           | 38.40                   |
| R. m. s. deviations                 |                         |
| Bond lengths (Å)                    | 0.003                   |
| Bond angles (°)                     | 0.580                   |

**Table S8** Interaction analysis of WT based on first-level network.

| Node-Node     | Interaction | Node-Node     | Interaction |
|---------------|-------------|---------------|-------------|
| Phe151-Ser155 | H-bond      | Lys381-Val430 | H-bond      |
| Ser155-Pro158 | vdWs        | Lys381-Met431 | vdWs        |
| Ser155-Val238 | vdWs        | Asp411-Glu415 | vdWs        |
| Ser155-Val238 | vdWs        | Gly420-Gly424 | H-bond      |
| Ser197-Gly200 | vdWs        | Gly424-Arg428 | H-bond      |
| Gly200-Met204 | vdWs        | Gly424-Arg428 | vdWs        |
| Leu227-Glu230 | H-bond      | Glu434-Val437 | H-bond      |
| Leu227-Ala231 | H-bond      | Ala450-Cys457 | H-bond      |
| Val247-Cys457 | vdWs        | Gly456-Ala460 | H-bond      |
| Ser303-Gly424 | vdWs        | Gly456-Ala460 | vdWs        |
| Phe363-Lys381 | vdWs        | Cys457-Leu461 | H-bond      |
| Leu37-Cys457  | vdWs        |               |             |

**Table S9** Interaction analysis of Mut10 based on first-level network.

| Node-Node     | Interaction            | Node-Node     | Interaction |
|---------------|------------------------|---------------|-------------|
| Phe151-Ala155 | H-bond                 | Gly275-Arg437 | H-bond      |
| Phe157-Tyr200 | $\pi$ - $\pi$ stacking | Ser303-Ala424 | vdWs        |
| Phe166-Tyr200 | $\pi$ - $\pi$ stacking | Ser303-Ala424 | vdWs        |
| Gly177-Glu227 | vdWs                   | Phe363-Pro381 | H-bond      |
| Ser179-Glu227 | vdWs                   | Pro381-Arg437 | vdWs        |
| Pro191-Asp194 | H-bond                 | Lys392-Gly411 | vdWs        |
| Pro191-Asp194 | vdWs                   | Gly420-Ala424 | H-bond      |
| Asp194-Ser197 | H-bond                 | Ala424-Ile427 | vdWs        |
| Asp194-Ser197 | vdWs                   | Ala424-Arg428 | H-bond      |
| Asp194-Tyr200 | vdWs                   | Met431-Arg437 | H-bond      |
| Pro195-Tyr200 | vdWs                   | Glu434-Arg437 | vdWs        |
| Pro195-Tyr200 | vdWs                   | Glu434-Arg437 | vdWs        |
| Ser197-Tyr200 | vdWs                   | Ala450-Gln457 | H-bond      |
| Tyr200-Met204 | H-bond                 | Ser456-Ala460 | H-bond      |
| Tyr200-Met204 | vdWs                   | Gln457-Ala460 | vdWs        |
| Glu227-Ala231 | H-bond                 | Gln457-Leu461 | H-bond      |
| Val247-Gln457 | H-bond                 | Gln457-Leu461 | vdWs        |

**Table S10** The number of interactions between different edge types of WT and Mut10 based on first-level network.

| Interaction            | WT | Mut10 |
|------------------------|----|-------|
| H-bond                 | 10 | 14    |
| $\pi$ - $\pi$ stacking | 0  | 2     |
| $\pi$ -cation          | 0  | 0     |
| Ionic bond             | 0  | 0     |
| $\pi$ -H bond          | 0  | 0     |
| vdWs                   | 13 | 18    |
| Total number           | 23 | 34    |

**Table S11** Interaction analysis of WT based on second-level network.

| Node-Node     | Interaction            | Node-Node     | Interaction |
|---------------|------------------------|---------------|-------------|
| Arg33-Leu37   | H-bond                 | Gly299-Gly420 | vdWs        |
| Leu34-Leu37   | vdWs                   | Leu300-Ser303 | vdWs        |
| Leu37-Cys457  | vdWs                   | Lys302-Arg428 | H-bond      |
| Phe144-Phe151 | $\pi$ - $\pi$ stacking | Ser303-Gly424 | vdWs        |
| Ser147-Phe151 | H-bond                 | Gly362-Met431 | vdWs        |
| Ala148-Phe151 | vdWs                   | Phe363-Ser371 | vdWs        |
| Phe151-Phe154 | $\pi$ - $\pi$ stacking | Phe363-Val380 | vdWs        |
| Phe151-Phe154 | vdWs                   | Phe363-Lys381 | vdWs        |
| Phe151-Ser155 | H-bond                 | Phe363-Ile382 | vdWs        |
| Phe151-Val216 | vdWs                   | Phe363-Ile382 | vdWs        |
| Ser155-Pro158 | vdWs                   | Phe363-Leu383 | H-bond      |
| Ser155-Val238 | vdWs                   | Lys381-Val430 | H-bond      |
| Ser155-Val238 | vdWs                   | Lys381-Met431 | vdWs        |
| Pro158-Lys162 | H-bond                 | Leu383-Val430 | vdWs        |
| Pro158-Lys162 | vdWs                   | Val405-Val430 | vdWs        |
| Pro158-Met204 | vdWs                   | Asp411-Glu415 | vdWs        |
| Pro158-Ser207 | vdWs                   | Trp412-Glu415 | H-bond      |
| Pro191-Ser197 | H-bond                 | Gly420-Gly424 | H-bond      |
| Pro191-Ser197 | vdWs                   | Gly424-Arg428 | H-bond      |
| Ser197-Gly200 | vdWs                   | Gly424-Arg428 | vdWs        |
| Ser197-Lys201 | H-bond                 | Glu425-Arg428 | H-bond      |
| Ser197-Lys201 | vdWs                   | Glu425-Arg428 | vdWs        |
| Gly200-Met204 | vdWs                   | Ala426-Val430 | H-bond      |
| Val218-Val247 | H-bond                 | Ile427-Val430 | H-bond      |
| Lys226-Glu230 | H-bond                 | Ile427-Met431 | H-bond      |
| Lys226-Glu230 | vdWs                   | Ile427-Met431 | vdWs        |
| Leu227-Glu230 | H-bond                 | Arg428-Asn432 | H-bond      |
| Leu227-Ala231 | H-bond                 | Val430-Asp433 | H-bond      |
| Glu230-Gly234 | H-bond                 | Val430-Leu436 | vdWs        |
| Glu230-Gly234 | vdWs                   | Glu434-Val437 | H-bond      |
| Ala231-Gly234 | vdWs                   | Asp446-Ala450 | H-bond      |
| Ala231-Lys236 | H-bond                 | Asp446-Ala450 | vdWs        |
| Ala231-Lys236 | vdWs                   | Ala447-Ala450 | H-bond      |
| Val238-Leu241 | vdWs                   | Ala450-Cys457 | H-bond      |
| Val238-Leu241 | vdWs                   | Gly456-Ala460 | H-bond      |
| Val247-Phe250 | vdWs                   | Gly456-Ala460 | vdWs        |
| Val247-Phe250 | vdWs                   | Cys457-Leu461 | H-bond      |
| Val247-Cys457 | vdWs                   | Ala460-Leu464 | H-bond      |

| Node-Node     | Interaction            | Node-Node     | Interaction |
|---------------|------------------------|---------------|-------------|
| Tyr279-Phe363 | $\pi$ - $\pi$ stacking | Ala460-Leu464 | vdWs        |
| Glu295-Gly420 | vdWs                   | Leu461-Leu464 | H-bond      |
| Gly299-Ser303 | H-bond                 | Leu461-Met465 | H-bond      |
| Gly299-Ser303 | vdWs                   | Leu461-Met465 | vdWs        |

**Table S12** Interaction analysis of Mut10 based on second-level network.

| Node-Node     | Interaction            | Node-Node     | Interaction   |
|---------------|------------------------|---------------|---------------|
| Phe144-Phe151 | $\pi$ - $\pi$ stacking | Asp298-Gly420 | vdWs          |
| Ser147-Phe151 | H-bond                 | Gly299-Ser303 | H-bond        |
| Ala148-Phe151 | vdWs                   | Leu300-Ser303 | vdWs          |
| Phe151-Phe154 | $\pi$ - $\pi$ stacking | Lys302-Arg428 | H-bond        |
| Phe151-Phe154 | H-bond                 | Lys302-Arg428 | vdWs          |
| Phe151-Ala155 | H-bond                 | Ser303-Ala424 | vdWs          |
| Phe151-Leu232 | vdWs                   | Ser303-Ala424 | vdWs          |
| Phe153-Phe157 | $\pi$ - $\pi$ stacking | Ser303-Arg428 | vdWs          |
| Phe153-Phe157 | H-bond                 | Trp305-Arg428 | vdWs          |
| Phe153-Phe157 | vdWs                   | Trp305-Met431 | vdWs          |
| Phe154-Phe157 | H-bond                 | Phe363-Ser371 | vdWs          |
| Phe157-Leu160 | H-bond                 | Phe363-Ser371 | vdWs          |
| Phe157-Leu160 | vdWs                   | Phe363-Ala375 | vdWs          |
| Phe157-Ala161 | H-bond                 | Phe363-Pro381 | H-bond        |
| Phe157-Phe166 | $\pi$ - $\pi$ stacking | Phe363-Ile382 | vdWs          |
| Phe157-Tyr200 | $\pi$ - $\pi$ stacking | Phe363-Leu383 | H-bond        |
| Phe157-Phe203 | $\pi$ - $\pi$ stacking | Pro381-Arg437 | vdWs          |
| Phe157-Phe203 | vdWs                   | Gly420-Ala424 | H-bond        |
| Phe157-Phe203 | vdWs                   | Glu421-Arg428 | H-bond        |
| Phe166-Leu193 | vdWs                   | Ile423-Ile427 | H-bond        |
| Phe166-Tyr200 | $\pi$ - $\pi$ stacking | Ala424-Ile427 | vdWs          |
| Pro191-Asp194 | H-bond                 | Ala424-Arg428 | H-bond        |
| Pro191-Asp194 | vdWs                   | Glu425-Arg428 | H-bond        |
| Pro191-Ser197 | H-bond                 | Ile427-Met431 | H-bond        |
| Pro191-Phe199 | vdWs                   | Ile427-Met431 | vdWs          |
| Pro191-Phe199 | vdWs                   | Arg428-Asn432 | H-bond        |
| Asp194-Ser197 | H-bond                 | Arg428-Asn432 | vdWs          |
| Asp194-Ser197 | vdWs                   | Met431-Arg437 | H-bond        |
| Asp194-Tyr200 | vdWs                   | Glu434-Arg437 | vdWs          |
| Pro195-Tyr200 | vdWs                   | Glu434-Arg437 | vdWs          |
| Pro195-Tyr200 | vdWs                   | Glu434-Met438 | H-bond        |
| Ser197-Tyr200 | vdWs                   | Ser186-Lys392 | H-bond        |
| Ser197-Lys201 | H-bond                 | Pro386-Lys392 | vdWs          |
| Ser197-Lys201 | vdWs                   | Pro386-Lys392 | vdWs          |
| Tyr200-Met204 | H-bond                 | Lys392-Glu396 | H-bond        |
| Tyr200-Met204 | vdWs                   | Lys392-Glu396 | vdWs          |
| Met204-Pro208 | vdWs                   | Lys392-Gly411 | vdWs          |
| Thr149-Ser179 | vdWs                   | Lys392-Trp412 | $\pi$ -cation |

| Node-Node     | Interaction            | Node-Node     | Interaction |
|---------------|------------------------|---------------|-------------|
| Gly177-Glu227 | vdWs                   | Lys392-Trp412 | vdWs        |
| Gly177-Ala231 | vdWs                   | Val218-Val247 | H-bond      |
| Ser179-Glu227 | vdWs                   | Val218-Val247 | vdWs        |
| Ser179-Ser228 | H-bond                 | Val247-Phe250 | vdWs        |
| Ser179-Ser228 | H-bond                 | Val247-Gln457 | H-bond      |
| Ser179-Ser228 | vdWs                   | Pro249-Ala450 | vdWs        |
| Ser179-Ser228 | vdWs                   | Asp446-Ala450 | H-bond      |
| Glu227-Ala231 | H-bond                 | Ala447-Ala450 | H-bond      |
| Ser228-Ala231 | vdWs                   | Ala450-Gln457 | H-bond      |
| Ala231-Lys236 | H-bond                 | Ser456-Ala460 | H-bond      |
| Ala231-Lys236 | vdWs                   | Gln457-Ala460 | vdWs        |
| Ala231-Lys236 | vdWs                   | Gln457-Leu461 | H-bond      |
| Ala231-Val237 | vdWs                   | Gln457-Leu461 | vdWs        |
| Gly275-Lys358 | H-bond                 | Ala460-Leu464 | H-bond      |
| Gly275-Ala359 | vdWs                   | Ala460-Leu464 | vdWs        |
| Gly275-Arg437 | H-bond                 | Leu461-Leu464 | H-bond      |
| Tyr279-Phe363 | $\pi$ - $\pi$ stacking | Leu461-Met465 | H-bond      |
| Glu295-Gly420 | H-bond                 |               |             |

**Table S13** The number of interactions between different edge types of WT and Mut10 based on second-level network.

| Interaction            | WT | Mut10 |
|------------------------|----|-------|
| H-bond                 | 34 | 44    |
| $\pi$ - $\pi$ stacking | 3  | 8     |
| $\pi$ -cation          | 0  | 1     |
| Ionic bond             | 0  | 0     |
| $\pi$ -H bond          | 0  | 0     |
| vdWs                   | 47 | 58    |
| Total number           | 84 | 111   |

**Table S14** Interaction analysis of WT based on overall network.

| Node-Node    | Interaction            | Node-Node     | Interaction |
|--------------|------------------------|---------------|-------------|
| His16-His44  | $\pi$ - $\pi$ stacking | Leu232-Val237 | vdWs        |
| His16-His44  | $\pi$ -H bond          | Leu232-Val244 | vdWs        |
| His16-Thr46  | H-bond                 | Asn233-Val244 | H-bond      |
| His16-Leu112 | vdWs                   | Asn233-Val244 | H-bond      |
| His16-Pro114 | H-bond                 | Val238-Leu241 | vdWs        |
| His16-Ser117 | H-bond                 | Val238-Leu241 | vdWs        |
| Val17-His44  | H-bond                 | Val247-Phe250 | vdWs        |
| Val17-His44  | vdWs                   | Val247-Phe250 | vdWs        |
| Val17-Val45  | vdWs                   | Val247-Cys457 | vdWs        |
| Ala18-Ser118 | H-bond                 | Pro249-Ile451 | vdWs        |
| Ala18-Ile120 | H-bond                 | Val251-Trp377 | vdWs        |
| Leu19-Thr46  | H-bond                 | Cys253-Glu256 | H-bond      |
| Leu19-Ile48  | H-bond                 | Cys253-Glu256 | vdWs        |
| Leu19-Ile120 | vdWs                   | Glu254-Lys257 | H-bond      |
| Leu20-Ile48  | vdWs                   | Glu254-Lys257 | vdWs        |
| Leu20-Ile120 | H-bond                 | Lys257-Glu353 | vdWs        |
| Leu20-Tyr121 | vdWs                   | Lys260-Glu263 | vdWs        |
| Leu20-Asp122 | vdWs                   | Ile265-Trp268 | H-bond      |
| Ser22-Asp122 | vdWs                   | Ile265-Leu269 | H-bond      |
| Ser22-Asp122 | vdWs                   | Ile265-Val345 | vdWs        |
| Ala23-Val54  | vdWs                   | Ser266-Leu269 | vdWs        |
| Ala23-Gln94  | vdWs                   | Ser266-Asp270 | vdWs        |
| Gly24-His27  | H-bond                 | Glu267-Asp270 | vdWs        |
| Gly24-His27  | vdWs                   | Trp268-Glu271 | vdWs        |
| Gly24-Leu28  | H-bond                 | Trp268-Gln272 | H-bond      |
| Gly24-Leu28  | vdWs                   | Trp268-Gln272 | vdWs        |
| Gly24-Glu58  | H-bond                 | Trp268-Lys341 | vdWs        |
| Met25-Thr29  | vdWs                   | Trp268-Lys341 | vdWs        |
| Gly26-Asn370 | H-bond                 | Trp268-Leu343 | vdWs        |
| His27-Phe31  | vdWs                   | Leu269-Leu308 | vdWs        |
| His27-Asp122 | Ionic bond             | Leu269-Leu308 | vdWs        |
| His27-Asp122 | H-bond                 | Leu269-His357 | vdWs        |
| Leu28-Leu32  | H-bond                 | Leu269-His357 | vdWs        |
| Leu28-Leu32  | vdWs                   | Asp270-His357 | H-bond      |
| Thr29-Arg33  | H-bond                 | Pro273-Ser276 | vdWs        |
| Thr29-Arg33  | vdWs                   | Pro273-Arg306 | vdWs        |
| Pro30-Leu34  | H-bond                 | Ser274-Lys358 | vdWs        |
| Phe31-Leu34  | H-bond                 | Ser274-Lys358 | vdWs        |

| Node-Node    | Interaction | Node-Node     | Interaction            |
|--------------|-------------|---------------|------------------------|
| Phe31-Ala35  | H-bond      | Gly275-Lys358 | H-bond                 |
| Phe31-Tyr121 | vdWs        | Ser276-Trp305 | vdWs                   |
| Phe31-Asp122 | vdWs        | Ser276-Arg306 | vdWs                   |
| Leu32-Ala35  | H-bond      | Ser276-Arg306 | vdWs                   |
| Leu32-Ser36  | H-bond      | Ser276-Ala359 | H-bond                 |
| Leu32-Leu61  | vdWs        | Val277-Ala359 | H-bond                 |
| Leu32-Phe65  | vdWs        | Val277-Gly361 | H-bond                 |
| Arg33-Leu37  | H-bond      | Val278-Arg306 | H-bond                 |
| Arg33-Phe250 | vdWs        | Val278-Phe307 | vdWs                   |
| Arg33-Glu256 | Ionic bond  | Val278-Leu308 | H-bond                 |
| Arg33-Glu256 | H-bond      | Val278-Val364 | vdWs                   |
| Arg33-Glu256 | H-bond      | Tyr279-Phe363 | $\pi$ - $\pi$ stacking |
| Arg33-Glu256 | vdWs        | Tyr279-Val364 | H-bond                 |
| Arg33-Glu374 | H-bond      | Tyr279-Val364 | vdWs                   |
| Arg33-Glu374 | H-bond      | Val280-Leu300 | vdWs                   |
| Leu34-Leu37  | vdWs        | Val280-Leu308 | H-bond                 |
| Leu34-Leu38  | H-bond      | Val280-Val310 | H-bond                 |
| Leu34-Leu38  | vdWs        | Val280-Val364 | vdWs                   |
| Leu34-Phe250 | vdWs        | Ser281-Val364 | H-bond                 |
| Ala35-Leu38  | H-bond      | Phe282-Trp309 | $\pi$ - $\pi$ stacking |
| Ala35-Leu39  | H-bond      | Phe282-His366 | vdWs                   |
| Ser36-Leu39  | vdWs        | Phe282-Trp385 | $\pi$ - $\pi$ stacking |
| Ser36-His40  | H-bond      | Phe282-Trp385 | vdWs                   |
| Ser36-His40  | vdWs        | Phe282-Leu387 | vdWs                   |
| Leu37-Cys457 | vdWs        | Gly283-His366 | $\pi$ -H bond          |
| Leu38-Gln41  | H-bond      | Thr286-Lys312 | vdWs                   |
| Leu39-His42  | H-bond      | Ala287-Glu413 | H-bond                 |
| Gln41-Gln462 | H-bond      | Met288-Leu293 | vdWs                   |
| Val45-Asn73  | H-bond      | Met288-Leu293 | vdWs                   |
| Thr46-Asn73  | vdWs        | Gly289-Gln292 | vdWs                   |
| Thr46-Asn73  | vdWs        | Gly289-Leu293 | H-bond                 |
| Thr46-Leu112 | vdWs        | Glu291-Arg294 | H-bond                 |
| Leu47-Asn73  | H-bond      | Gln292-Glu295 | vdWs                   |
| Leu47-Gln74  | vdWs        | Gln292-Val296 | vdWs                   |
| Leu47-Leu75  | H-bond      | Gln292-Val418 | H-bond                 |
| Leu47-Leu75  | vdWs        | Gln292-Val418 | H-bond                 |
| Ile48-Leu75  | vdWs        | Gln292-Val418 | vdWs                   |
| Ile48-Leu109 | vdWs        | Leu293-Val296 | vdWs                   |
| Thr49-Leu75  | vdWs        | Arg294-Asp298 | H-bond                 |

| Node-Node    | Interaction            | Node-Node     | Interaction |
|--------------|------------------------|---------------|-------------|
| Thr49-Phe77  | H-bond                 | Arg294-Asp298 | vdWs        |
| Gln51-His76  | vdWs                   | Arg294-Val327 | vdWs        |
| Gln51-Phe77  | H-bond                 | Glu295-Asp298 | H-bond      |
| Val54-Phe91  | vdWs                   | Glu295-Gly299 | H-bond      |
| Ser55-Glu58  | H-bond                 | Glu295-Gly299 | vdWs        |
| Ser55-Glu58  | vdWs                   | Glu295-Val418 | vdWs        |
| Ser55-Glu58  | vdWs                   | Glu295-Gly420 | vdWs        |
| Ser55-Phe91  | vdWs                   | Glu295-Ile423 | vdWs        |
| Lys56-Glu59  | H-bond                 | Val296-Gly299 | H-bond      |
| Lys56-Asp60  | H-bond                 | Val296-Gly299 | vdWs        |
| Ala57-Asp60  | H-bond                 | Val296-Leu300 | H-bond      |
| Ala57-Leu61  | H-bond                 | Asp298-Val301 | vdWs        |
| Glu58-Leu62  | H-bond                 | Asp298-Lys302 | Ionic bond  |
| Glu59-Ser63  | H-bond                 | Asp298-Lys302 | H-bond      |
| Asp60-Arg64  | H-bond                 | Gly299-Lys302 | vdWs        |
| Leu61-Arg64  | vdWs                   | Gly299-Ser303 | H-bond      |
| Leu61-Phe65  | H-bond                 | Gly299-Ser303 | vdWs        |
| Leu61-Phe65  | vdWs                   | Gly299-Gly420 | vdWs        |
| Leu62-Phe65  | H-bond                 | Leu300-Ser303 | vdWs        |
| Leu62-Phe65  | vdWs                   | Val301-Gly304 | vdWs        |
| Leu62-Leu66  | H-bond                 | Val301-Arg335 | vdWs        |
| Leu62-Leu66  | vdWs                   | Lys302-Arg428 | H-bond      |
| Leu62-Leu66  | vdWs                   | Ser303-Gly424 | vdWs        |
| Ser63-Ser67  | H-bond                 | Gly304-Lys341 | H-bond      |
| Ser63-Ser67  | vdWs                   | Phe307-Met336 | vdWs        |
| Arg64-Ala68  | H-bond                 | Phe307-Lys341 | H-bond      |
| Arg64-Phe255 | H-bond                 | Phe307-Leu343 | H-bond      |
| Arg64-Glu256 | vdWs                   | Leu308-Ile354 | vdWs        |
| Phe65-Ala68  | vdWs                   | Trp309-Leu343 | H-bond      |
| Phe65-Phe69  | $\pi$ - $\pi$ stacking | Trp309-Val345 | H-bond      |
| Phe65-Phe69  | H-bond                 | Val310-Val345 | vdWs        |
| Phe65-Phe69  | vdWs                   | Val311-Val345 | H-bond      |
| Phe65-Phe255 | $\pi$ - $\pi$ stacking | Val311-Val345 | vdWs        |
| Phe65-Phe255 | vdWs                   | Gly329-Leu332 | H-bond      |
| Leu66-Phe69  | vdWs                   | Gly329-Val333 | H-bond      |
| Leu66-Gln74  | vdWs                   | Gly329-Val333 | vdWs        |
| Phe69-Val72  | vdWs                   | Phe330-Glu334 | H-bond      |
| Phe69-Phe255 | $\pi$ - $\pi$ stacking | Glu331-Arg335 | H-bond      |
| Asn73-Leu112 | vdWs                   | Glu331-Arg335 | vdWs        |

| Node-Node     | Interaction   | Node-Node     | Interaction |
|---------------|---------------|---------------|-------------|
| Phe77-Ser101  | vdWs          | Leu332-Arg335 | vdWs        |
| Phe77-Ser102  | vdWs          | Leu332-Met336 | H-bond      |
| Phe77-Ser102  | vdWs          | Val333-Val337 | H-bond      |
| Phe77-Leu105  | vdWs          | Val333-Val337 | vdWs        |
| Phe77-Leu105  | vdWs          | Glu334-Val337 | H-bond      |
| Pro80-Ser101  | vdWs          | Glu334-Lys338 | H-bond      |
| Pro90-Leu93   | H-bond        | Arg335-Glu339 | Ionic bond  |
| Gln94-Ile98   | H-bond        | Arg335-Glu339 | H-bond      |
| Phe95-Arg99   | vdWs          | Arg335-Glu339 | H-bond      |
| Ala96-Arg99   | H-bond        | Arg335-Glu339 | H-bond      |
| Ala96-Arg99   | vdWs          | Arg335-Glu339 | vdWs        |
| Ala96-Ser100  | H-bond        | Arg335-Glu339 | vdWs        |
| Ile98-Ser101  | vdWs          | Val337-Lys340 | vdWs        |
| Ile98-Ser102  | H-bond        | Val345-Val349 | vdWs        |
| Ser101-Leu104 | H-bond        | Asp350-Glu353 | H-bond      |
| Ser101-Leu104 | vdWs          | Asp350-Glu353 | vdWs        |
| Ser102-Leu105 | H-bond        | Asp350-Ile354 | H-bond      |
| Leu105-Leu109 | H-bond        | Gln351-Ile354 | vdWs        |
| Thr106-Ser110 | H-bond        | Gln351-Leu355 | H-bond      |
| Thr106-Ser110 | vdWs          | Gln351-Ser371 | H-bond      |
| Pro107-Ser111 | H-bond        | Gln351-Glu374 | H-bond      |
| Pro107-Ser111 | vdWs          | Ser352-Gly356 | H-bond      |
| Leu116-Val138 | vdWs          | Glu353-Gly356 | vdWs        |
| Ser118-Pro139 | vdWs          | Glu353-His357 | H-bond      |
| Ser118-Trp468 | $\pi$ -H bond | Ile354-His357 | H-bond      |
| Ser118-Trp468 | vdWs          | Ile354-Val360 | vdWs        |
| Phe119-Pro139 | H-bond        | His357-Val360 | H-bond      |
| Phe119-His140 | vdWs          | Gly362-Met431 | vdWs        |
| Tyr121-Leu143 | H-bond        | Phe363-Ser371 | vdWs        |
| Asp122-Leu125 | H-bond        | Phe363-Val380 | vdWs        |
| Asp122-Leu125 | vdWs          | Phe363-Lys381 | vdWs        |
| Met123-Ile126 | H-bond        | Phe363-Ile382 | vdWs        |
| Met123-Ile126 | vdWs          | Phe363-Ile382 | vdWs        |
| Met123-Phe144 | vdWs          | Phe363-Leu383 | H-bond      |
| Leu125-Pro128 | vdWs          | Val364-Leu383 | vdWs        |
| Leu125-Leu129 | H-bond        | Ser365-Leu383 | H-bond      |
| Ile126-Leu130 | vdWs          | Ser365-Trp385 | H-bond      |
| Ile126-Asp206 | vdWs          | His366-Trp385 | vdWs        |
| Ile126-Leu213 | vdWs          | Cys367-Gly384 | vdWs        |

| Node-Node     | Interaction            | Node-Node     | Interaction            |
|---------------|------------------------|---------------|------------------------|
| Pro128-Pro131 | vdWs                   | Cys367-Asn394 | H-bond                 |
| Leu129-Ile132 | vdWs                   | Gly368-Ser371 | H-bond                 |
| Leu129-Ala133 | H-bond                 | Gly368-Ser371 | vdWs                   |
| Leu129-Ala133 | vdWs                   | Gly368-Val372 | H-bond                 |
| Leu130-Ala133 | H-bond                 | Trp369-Val372 | vdWs                   |
| Leu130-Glu134 | H-bond                 | Trp369-Val373 | H-bond                 |
| Pro131-Ser135 | H-bond                 | Trp369-Val373 | vdWs                   |
| Ile132-Leu136 | vdWs                   | Asn370-Glu374 | H-bond                 |
| Ala133-Leu136 | H-bond                 | Ser371-Ala375 | H-bond                 |
| His140-Lys212 | H-bond                 | Val372-Ala376 | H-bond                 |
| His140-His214 | $\pi$ - $\pi$ stacking | Val373-Ala376 | vdWs                   |
| His140-His214 | H-bond                 | Val373-Trp377 | H-bond                 |
| His140-His214 | vdWs                   | Glu374-Trp377 | H-bond                 |
| Tyr141-His214 | $\pi$ - $\pi$ stacking | Glu374-Trp377 | vdWs                   |
| Tyr141-Tyr245 | $\pi$ - $\pi$ stacking | Glu374-Phe378 | H-bond                 |
| Tyr141-Trp468 | $\pi$ - $\pi$ stacking | Ala375-Val380 | H-bond                 |
| Tyr141-Trp468 | H-bond                 | Ala375-Val380 | vdWs                   |
| Tyr141-Trp468 | vdWs                   | Ala376-Trp403 | vdWs                   |
| Ile142-Gly215 | vdWs                   | Trp377-Lys444 | vdWs                   |
| Ile142-Leu217 | H-bond                 | Trp377-Arg448 | vdWs                   |
| Phe144-Met150 | vdWs                   | Lys381-Val430 | H-bond                 |
| Phe144-Phe151 | $\pi$ - $\pi$ stacking | Lys381-Met431 | vdWs                   |
| Phe144-Leu217 | H-bond                 | Ile382-Trp403 | H-bond                 |
| Ser146-Asp390 | H-bond                 | Ile382-Val405 | H-bond                 |
| Ser146-Asn394 | H-bond                 | Ile382-Val405 | vdWs                   |
| Ser147-Met150 | H-bond                 | Leu383-Ala426 | vdWs                   |
| Ser147-Met150 | vdWs                   | Leu383-Val430 | vdWs                   |
| Ser147-Met150 | vdWs                   | Gly384-Val405 | H-bond                 |
| Ser147-Phe151 | H-bond                 | Trp385-Trp410 | $\pi$ - $\pi$ stacking |
| Ser147-Asn394 | H-bond                 | Trp385-Trp410 | $\pi$ - $\pi$ stacking |
| Ala148-Phe151 | vdWs                   | Trp385-Trp410 | vdWs                   |
| Ala148-Ser152 | H-bond                 | Pro386-Gln391 | vdWs                   |
| Ala148-Val218 | vdWs                   | Pro386-Lys392 | vdWs                   |
| Ala148-Glu225 | H-bond                 | Leu387-Gln391 | H-bond                 |
| Ala148-Glu225 | vdWs                   | Leu387-Gln391 | vdWs                   |
| Ala148-Glu225 | vdWs                   | Leu387-Glu413 | H-bond                 |
| Thr149-Ser152 | H-bond                 | Leu387-Glu413 | vdWs                   |
| Thr149-Phe153 | H-bond                 | His388-Gln391 | H-bond                 |
| Thr149-Phe153 | vdWs                   | His388-Gln391 | H-bond                 |

| Node-Node     | Interaction            | Node-Node     | Interaction   |
|---------------|------------------------|---------------|---------------|
| Thr149-Glu225 | vdWs                   | His388-Gln391 | vdWs          |
| Met150-Phe153 | H-bond                 | His388-Gln391 | vdWs          |
| Met150-Phe153 | vdWs                   | His388-Trp412 | vdWs          |
| Met150-Phe154 | H-bond                 | His388-Glu413 | Ionic bond    |
| Met150-Asp390 | vdWs                   | His388-Glu413 | H-bond        |
| Phe151-Phe154 | $\pi$ - $\pi$ stacking | His388-Glu413 | vdWs          |
| Phe151-Phe154 | vdWs                   | Asp390-Asn394 | H-bond        |
| Phe151-Ser155 | H-bond                 | Gln391-Ala395 | H-bond        |
| Phe151-Val216 | vdWs                   | Gln391-Ala395 | vdWs          |
| Ser152-Tyr156 | vdWs                   | Lys392-Glu396 | H-bond        |
| Ser152-Leu232 | vdWs                   | Lys392-Trp412 | $\pi$ -cation |
| Phe153-Phe157 | H-bond                 | Ile393-Glu396 | H-bond        |
| Phe153-Ile183 | vdWs                   | Ile393-Val397 | H-bond        |
| Phe154-Phe157 | vdWs                   | Ile393-Val397 | vdWs          |
| Phe154-Phe203 | $\pi$ - $\pi$ stacking | Asn394-Val397 | vdWs          |
| Phe154-Phe203 | vdWs                   | Asn394-Val398 | H-bond        |
| Phe154-Asp206 | vdWs                   | Ala395-Val398 | vdWs          |
| Phe154-Ser207 | H-bond                 | Ala395-Ala399 | H-bond        |
| Phe154-Ser207 | vdWs                   | Glu396-Ala399 | vdWs          |
| Ser155-Pro158 | vdWs                   | Glu396-Lys400 | H-bond        |
| Ser155-Val238 | vdWs                   | Glu396-Lys400 | vdWs          |
| Ser155-Val238 | vdWs                   | Glu396-Trp406 | H-bond        |
| Tyr156-Leu160 | H-bond                 | Val398-Gly401 | H-bond        |
| Phe157-Leu160 | H-bond                 | Ala399-Gly402 | H-bond        |
| Phe157-Leu160 | vdWs                   | Gly402-Leu436 | vdWs          |
| Phe157-Ala161 | H-bond                 | Gly402-Lys439 | vdWs          |
| Phe157-Phe166 | $\pi$ - $\pi$ stacking | Val405-Val430 | vdWs          |
| Phe157-Phe203 | $\pi$ - $\pi$ stacking | Lys407-Glu429 | Ionic bond    |
| Pro158-Lys162 | H-bond                 | Lys407-Glu429 | H-bond        |
| Pro158-Lys162 | vdWs                   | Gly409-Arg416 | H-bond        |
| Pro158-Met204 | vdWs                   | Asp411-Glu415 | vdWs          |
| Pro158-Ser207 | vdWs                   | Trp412-Glu415 | H-bond        |
| Leu160-Leu170 | vdWs                   | Arg416-Glu422 | Ionic bond    |
| Ala161-Phe166 | vdWs                   | Arg416-Glu422 | H-bond        |
| Pro167-Arg185 | H-bond                 | Arg416-Glu422 | H-bond        |
| Pro167-Arg185 | vdWs                   | Arg416-Glu422 | vdWs          |
| Asp171-Arg185 | H-bond                 | Val418-Ile423 | vdWs          |
| Val173-Ile183 | H-bond                 | Lys419-Glu422 | H-bond        |
| Val173-Ile183 | H-bond                 | Lys419-Glu422 | H-bond        |

| Node-Node     | Interaction            | Node-Node     | Interaction |
|---------------|------------------------|---------------|-------------|
| Val173-Ile183 | vdWs                   | Lys419-Ile423 | H-bond      |
| Ile175-Val178 | vdWs                   | Gly420-Gly424 | H-bond      |
| Ile175-Val237 | vdWs                   | Glu421-Glu425 | H-bond      |
| Pro176-Lys236 | vdWs                   | Glu421-Glu425 | vdWs        |
| Val178-Ser228 | vdWs                   | Glu422-Glu425 | vdWs        |
| Ser179-Ser228 | H-bond                 | Glu422-Ala426 | H-bond      |
| Val180-Ile183 | vdWs                   | Ile423-Ala426 | vdWs        |
| Pro184-Ser187 | H-bond                 | Ile423-Ile427 | H-bond      |
| Arg185-Ile188 | H-bond                 | Gly424-Arg428 | H-bond      |
| Ser186-Lys392 | H-bond                 | Gly424-Arg428 | vdWs        |
| Ser186-Lys392 | vdWs                   | Glu425-Arg428 | H-bond      |
| Ser187-Trp412 | vdWs                   | Glu425-Arg428 | vdWs        |
| Ile188-Leu193 | vdWs                   | Glu425-Glu429 | H-bond      |
| Pro189-Leu192 | H-bond                 | Ala426-Glu429 | H-bond      |
| Pro189-Leu192 | vdWs                   | Ala426-Val430 | H-bond      |
| Pro190-Leu193 | H-bond                 | Ile427-Val430 | H-bond      |
| Pro190-Leu193 | vdWs                   | Ile427-Met431 | H-bond      |
| Pro191-Ser197 | H-bond                 | Ile427-Met431 | vdWs        |
| Pro191-Ser197 | vdWs                   | Arg428-Asn432 | H-bond      |
| Ser197-Gly200 | vdWs                   | Glu429-Asp433 | vdWs        |
| Ser197-Lys201 | H-bond                 | Val430-Asp433 | H-bond      |
| Ser197-Lys201 | vdWs                   | Val430-Leu436 | vdWs        |
| Leu198-Lys201 | H-bond                 | Asp433-Leu436 | vdWs        |
| Leu198-Leu202 | H-bond                 | Asp433-Leu436 | vdWs        |
| Leu198-Leu202 | vdWs                   | Glu434-Val437 | H-bond      |
| Phe199-Leu202 | vdWs                   | Ser435-Met438 | vdWs        |
| Phe199-Phe203 | $\pi$ - $\pi$ stacking | Ser435-Lys439 | H-bond      |
| Phe199-Phe203 | H-bond                 | Leu436-Ala440 | H-bond      |
| Phe199-Phe203 | vdWs                   | Leu436-Ala440 | vdWs        |
| Gly200-Met204 | vdWs                   | Met438-Gln442 | H-bond      |
| Leu202-Glu205 | H-bond                 | Lys439-Val443 | H-bond      |
| Leu202-Asp206 | H-bond                 | Ala440-Lys444 | H-bond      |
| Leu202-Asp206 | vdWs                   | Ala440-Lys444 | vdWs        |
| Phe203-Ser207 | H-bond                 | Thr441-Lys444 | H-bond      |
| Glu205-Pro208 | vdWs                   | Thr441-Lys445 | H-bond      |
| Glu205-Lys209 | H-bond                 | Thr441-Lys445 | vdWs        |
| Glu205-Lys209 | vdWs                   | Gln442-Lys445 | H-bond      |
| Asp206-Lys209 | H-bond                 | Gln442-Lys445 | vdWs        |
| Asp206-Lys209 | vdWs                   | Gln442-Asp446 | H-bond      |

| Node-Node     | Interaction | Node-Node     | Interaction |
|---------------|-------------|---------------|-------------|
| Ser207-Leu210 | H-bond      | Gln442-Asp446 | vdWs        |
| Ser207-Leu210 | vdWs        | Val443-Asp446 | H-bond      |
| Lys209-Lys212 | H-bond      | Val443-Asp446 | vdWs        |
| Lys209-Leu213 | vdWs        | Val443-Ala447 | H-bond      |
| Leu210-Leu213 | vdWs        | Lys444-Ala447 | vdWs        |
| Leu210-Pro242 | vdWs        | Lys444-Arg448 | H-bond      |
| Leu213-Pro242 | vdWs        | Lys445-Arg448 | vdWs        |
| Val216-Pro243 | H-bond      | Lys445-Lys449 | H-bond      |
| Val218-Tyr245 | H-bond      | Asp446-Ala450 | H-bond      |
| Val218-Val247 | H-bond      | Asp446-Ala450 | vdWs        |
| Asn219-Pro249 | vdWs        | Ala447-Ala450 | H-bond      |
| Asn219-Phe250 | H-bond      | Arg448-Ile451 | vdWs        |
| Asn219-Trp369 | H-bond      | Lys449-Gly455 | H-bond      |
| Asn219-Val373 | vdWs        | Ala450-Cys457 | H-bond      |
| Thr220-Glu225 | vdWs        | Gly455-Glu458 | H-bond      |
| Thr220-Gly248 | H-bond      | Gly455-Val459 | H-bond      |
| Thr220-Gly248 | vdWs        | Gly455-Val459 | vdWs        |
| Thr220-Trp369 | vdWs        | Gly455-Val459 | vdWs        |
| Phe221-Ile224 | H-bond      | Gly456-Ala460 | H-bond      |
| Phe221-Glu225 | H-bond      | Gly456-Ala460 | vdWs        |
| Phe221-Pro249 | vdWs        | Cys457-Leu461 | H-bond      |
| Phe221-Ala447 | vdWs        | Glu458-Gln462 | H-bond      |
| Glu222-Lys226 | H-bond      | Val459-Gln462 | H-bond      |
| Glu222-Lys226 | vdWs        | Val459-Lys463 | H-bond      |
| Ile224-Trp369 | vdWs        | Ala460-Leu464 | H-bond      |
| Lys226-Glu230 | H-bond      | Ala460-Leu464 | vdWs        |
| Lys226-Glu230 | vdWs        | Leu461-Leu464 | H-bond      |
| Leu227-Glu230 | H-bond      | Leu461-Met465 | H-bond      |
| Leu227-Ala231 | H-bond      | Leu461-Met465 | vdWs        |
| Ser228-Leu232 | H-bond      | Gln462-Glu466 | vdWs        |
| Leu229-Asn233 | H-bond      | Lys463-Glu466 | vdWs        |
| Leu229-Asn233 | vdWs        | Lys463-Glu466 | vdWs        |
| Glu230-Gly234 | H-bond      | Leu464-Val467 | vdWs        |
| Glu230-Gly234 | vdWs        | Leu464-Trp468 | H-bond      |
| Ala231-Gly234 | vdWs        | Leu464-Trp468 | vdWs        |
| Ala231-Lys236 | H-bond      | Leu464-Trp468 | vdWs        |
| Ala231-Lys236 | vdWs        |               |             |

**Table S15** Interaction analysis of Mut10 based on overall network.

| Node-Node    | Interaction            | Node-Node     | Interaction |
|--------------|------------------------|---------------|-------------|
| His16-His44  | $\pi$ - $\pi$ stacking | Ser228-Ala231 | vdWs        |
| His16-His44  | $\pi$ -H bond          | Ser228-Leu232 | H-bond      |
| His16-His44  | vdWs                   | Leu229-Asn233 | H-bond      |
| His16-His44  | vdWs                   | Glu230-Asn233 | H-bond      |
| His16-Thr46  | H-bond                 | Glu230-Gly234 | H-bond      |
| His16-Thr46  | vdWs                   | Glu230-Lys236 | vdWs        |
| His16-Pro114 | H-bond                 | Ala231-Lys236 | H-bond      |
| His16-Ser117 | H-bond                 | Ala231-Lys236 | vdWs        |
| His16-Ser117 | H-bond                 | Ala231-Lys236 | vdWs        |
| His16-Ser117 | vdWs                   | Ala231-Val237 | vdWs        |
| His16-Ser117 | vdWs                   | Leu232-Val244 | vdWs        |
| His16-Ser118 | H-bond                 | Asn233-Val244 | H-bond      |
| Val17-His44  | H-bond                 | Asn233-Val244 | H-bond      |
| Ala18-Leu116 | vdWs                   | Asn233-Val244 | vdWs        |
| Ala18-Ser118 | H-bond                 | Val238-Leu241 | vdWs        |
| Ala18-Ser118 | vdWs                   | Val247-Phe250 | vdWs        |
| Ala18-Phe119 | vdWs                   | Val247-Gln457 | H-bond      |
| Ala18-Ile120 | H-bond                 | Pro249-Ala450 | vdWs        |
| Leu19-Thr46  | H-bond                 | Pro252-Glu256 | vdWs        |
| Leu19-Ile48  | H-bond                 | Pro252-Ser352 | vdWs        |
| Leu20-Ile48  | vdWs                   | Cys253-Glu256 | H-bond      |
| Leu20-Leu105 | vdWs                   | Cys253-Glu256 | H-bond      |
| Leu20-Ile120 | H-bond                 | Cys253-Glu256 | vdWs        |
| Leu20-Ile120 | vdWs                   | Glu254-Lys257 | H-bond      |
| Leu20-Asp122 | H-bond                 | Glu254-Lys257 | vdWs        |
| Ser22-Asp122 | H-bond                 | Arg261-Trp348 | H-bond      |
| Ser22-Asp122 | vdWs                   | Arg261-Trp348 | H-bond      |
| Ser22-Asp122 | vdWs                   | Arg261-Asp350 | vdWs        |
| Ser22-Thr124 | H-bond                 | Glu263-Ser266 | H-bond      |
| Ala23-Gln94  | vdWs                   | Glu263-Glu267 | H-bond      |
| Ala23-Gln94  | vdWs                   | Thr264-Glu267 | vdWs        |
| Gly24-His27  | H-bond                 | Thr264-Trp268 | H-bond      |
| Gly24-His27  | vdWs                   | Ile265-Trp268 | H-bond      |
| Gly24-Leu28  | H-bond                 | Ile265-Leu269 | H-bond      |
| Gly24-Glu58  | H-bond                 | Ser266-Leu269 | vdWs        |
| Gly24-Phe91  | vdWs                   | Ser266-Asp270 | H-bond      |
| Met25-Leu61  | vdWs                   | Glu267-Asp270 | vdWs        |
| Gly26-Asn370 | H-bond                 | Glu267-Asp270 | vdWs        |

| Node-Node    | Interaction | Node-Node     | Interaction            |
|--------------|-------------|---------------|------------------------|
| Gly26-Asn370 | vdWs        | Trp268-Glu271 | H-bond                 |
| His27-Phe31  | vdWs        | Trp268-Gln272 | H-bond                 |
| His27-Asp122 | Ionic bond  | Leu269-Gln272 | H-bond                 |
| His27-Asp122 | H-bond      | Leu269-His357 | vdWs                   |
| Leu28-Phe31  | H-bond      | Asp270-His357 | H-bond                 |
| Leu28-Phe31  | vdWs        | Gln272-Arg306 | H-bond                 |
| Leu28-Leu32  | H-bond      | Gln272-Arg306 | vdWs                   |
| Leu28-Leu62  | vdWs        | Pro273-Ser276 | vdWs                   |
| Thr29-Arg33  | H-bond      | Pro273-Ala359 | vdWs                   |
| Pro30-Leu34  | H-bond      | Ser274-Lys358 | vdWs                   |
| Phe31-Ala35  | H-bond      | Ser274-Lys358 | vdWs                   |
| Phe31-Asp122 | vdWs        | Gly275-Lys358 | H-bond                 |
| Phe31-Leu143 | vdWs        | Gly275-Ala359 | vdWs                   |
| Leu32-Ala35  | vdWs        | Gly275-Arg437 | H-bond                 |
| Leu32-Ser36  | H-bond      | Ser276-Arg306 | H-bond                 |
| Leu32-Leu61  | vdWs        | Ser276-Ala359 | H-bond                 |
| Arg33-Leu37  | H-bond      | Ser276-Ala359 | vdWs                   |
| Arg33-Phe250 | vdWs        | Val277-Arg306 | vdWs                   |
| Arg33-Glu256 | Ionic bond  | Val277-Ala359 | H-bond                 |
| Arg33-Glu256 | H-bond      | Val277-Gly361 | H-bond                 |
| Arg33-Glu256 | H-bond      | Val278-Arg306 | H-bond                 |
| Arg33-Glu256 | vdWs        | Val278-Phe307 | vdWs                   |
| Arg33-Glu374 | H-bond      | Val278-Leu308 | H-bond                 |
| Arg33-Glu374 | H-bond      | Val278-Gly362 | vdWs                   |
| Arg33-Glu374 | vdWs        | Val278-Val364 | vdWs                   |
| Leu34-Leu37  | H-bond      | Tyr279-Phe363 | $\pi$ - $\pi$ stacking |
| Leu34-Leu37  | vdWs        | Tyr279-Val364 | H-bond                 |
| Leu34-Leu38  | H-bond      | Val280-Leu308 | H-bond                 |
| Ala35-Leu38  | H-bond      | Val280-Val310 | H-bond                 |
| Ala35-Leu39  | H-bond      | Val280-Val364 | vdWs                   |
| Ala35-Leu39  | vdWs        | Ser281-Val364 | H-bond                 |
| Ser36-Leu39  | vdWs        | Ser281-Val364 | vdWs                   |
| Ser36-His40  | H-bond      | Phe282-Trp309 | $\pi$ - $\pi$ stacking |
| Leu37-His40  | vdWs        | Phe282-Trp385 | $\pi$ - $\pi$ stacking |
| Leu37-Gln41  | H-bond      | Gly283-His366 | $\pi$ -H bond          |
| Leu37-Gln41  | vdWs        | Gly283-His366 | vdWs                   |
| Leu38-Gln41  | vdWs        | Ser284-Lys312 | vdWs                   |
| Leu38-Cys43  | H-bond      | Ser284-Trp348 | vdWs                   |
| Leu39-His42  | H-bond      | Thr286-Asp313 | vdWs                   |

| Node-Node    | Interaction | Node-Node     | Interaction |
|--------------|-------------|---------------|-------------|
| Cys43-Met465 | vdWs        | Ala287-His388 | H-bond      |
| Val45-Val72  | vdWs        | Ala287-His388 | vdWs        |
| Val45-Asn73  | H-bond      | Ala287-His388 | vdWs        |
| Thr46-Asn73  | H-bond      | Ala287-Glu413 | vdWs        |
| Thr46-Asn73  | vdWs        | Met288-Gln292 | vdWs        |
| Leu47-Asn73  | H-bond      | Gly289-Leu293 | H-bond      |
| Leu47-Leu75  | H-bond      | Gly289-Glu413 | H-bond      |
| Ile48-Leu75  | vdWs        | Arg290-Leu293 | H-bond      |
| Ile48-Leu109 | vdWs        | Arg290-Leu293 | vdWs        |
| Thr49-Gln74  | H-bond      | Arg290-Arg294 | H-bond      |
| Thr49-Phe77  | H-bond      | Gln292-Glu295 | vdWs        |
| Pro50-Leu79  | vdWs        | Gln292-Val296 | H-bond      |
| Gln51-His76  | vdWs        | Gln292-Val296 | vdWs        |
| Gln51-Phe77  | H-bond      | Gln292-Val418 | H-bond      |
| Gln51-Leu79  | H-bond      | Gln292-Val418 | H-bond      |
| Gln51-Leu79  | vdWs        | Gln292-Val418 | vdWs        |
| Val54-Glu58  | vdWs        | Leu293-Val296 | H-bond      |
| Val54-Phe91  | vdWs        | Leu293-Gly297 | H-bond      |
| Ser55-Glu58  | H-bond      | Leu293-Leu328 | vdWs        |
| Ser55-Glu58  | H-bond      | Arg294-Gly297 | H-bond      |
| Ser55-Glu59  | H-bond      | Arg294-Asp298 | H-bond      |
| Lys56-Glu59  | H-bond      | Arg294-Leu328 | vdWs        |
| Lys56-Asp60  | H-bond      | Glu295-Asp298 | H-bond      |
| Lys56-Asp60  | H-bond      | Glu295-Asp298 | vdWs        |
| Lys56-Asp317 | H-bond      | Glu295-Gly299 | H-bond      |
| Lys56-Asp317 | vdWs        | Glu295-Val418 | vdWs        |
| Ala57-Asp60  | vdWs        | Glu295-Lys419 | vdWs        |
| Ala57-Leu61  | H-bond      | Glu295-Gly420 | H-bond      |
| Glu58-Leu62  | H-bond      | Val296-Gly299 | H-bond      |
| Glu58-Leu62  | vdWs        | Val296-Gly299 | vdWs        |
| Glu59-Leu62  | vdWs        | Val296-Leu300 | H-bond      |
| Glu59-Ser63  | H-bond      | Val296-Trp385 | vdWs        |
| Glu59-Ser63  | vdWs        | Gly297-Leu300 | vdWs        |
| Asp60-Arg64  | H-bond      | Gly297-Val301 | H-bond      |
| Leu61-Arg64  | vdWs        | Asp298-Val301 | vdWs        |
| Leu61-Phe65  | H-bond      | Asp298-Lys302 | Ionic bond  |
| Leu62-Phe65  | H-bond      | Asp298-Lys302 | H-bond      |
| Leu62-Phe65  | vdWs        | Asp298-Lys302 | H-bond      |
| Leu62-Leu66  | H-bond      | Asp298-Lys302 | vdWs        |

| Node-Node     | Interaction            | Node-Node     | Interaction |
|---------------|------------------------|---------------|-------------|
| Ser63-Ser67   | H-bond                 | Asp298-Lys302 | vdWs        |
| Arg64-Ala68   | H-bond                 | Asp298-Leu332 | vdWs        |
| Arg64-Phe255  | H-bond                 | Asp298-Gly420 | vdWs        |
| Arg64-Glu256  | H-bond                 | Gly299-Ser303 | H-bond      |
| Arg64-Val258  | vdWs                   | Gly299-Ile423 | vdWs        |
| Phe65-Ala68   | H-bond                 | Leu300-Ser303 | vdWs        |
| Phe65-Ala68   | vdWs                   | Leu300-Phe307 | vdWs        |
| Phe65-Phe69   | $\pi$ - $\pi$ stacking | Val301-Gly304 | H-bond      |
| Phe65-Phe69   | H-bond                 | Val301-Arg335 | vdWs        |
| Phe65-Phe255  | $\pi$ - $\pi$ stacking | Val301-Met336 | vdWs        |
| Phe65-Phe255  | vdWs                   | Lys302-Arg428 | H-bond      |
| Leu66-Phe69   | vdWs                   | Lys302-Arg428 | vdWs        |
| Leu66-Pro70   | vdWs                   | Ser303-Ala424 | vdWs        |
| Leu66-Gln74   | vdWs                   | Ser303-Ala424 | vdWs        |
| Phe69-Val72   | H-bond                 | Ser303-Arg428 | vdWs        |
| Phe69-Val72   | vdWs                   | Gly304-Lys341 | vdWs        |
| Phe69-Phe255  | $\pi$ - $\pi$ stacking | Trp305-Arg428 | vdWs        |
| Leu75-Leu108  | vdWs                   | Trp305-Met431 | vdWs        |
| Leu79-Gln94   | vdWs                   | Phe307-Lys341 | H-bond      |
| Pro80-Ser101  | vdWs                   | Phe307-Lys341 | vdWs        |
| Pro90-Gln94   | H-bond                 | Phe307-Leu343 | H-bond      |
| Phe91-Gln94   | vdWs                   | Leu308-Leu343 | vdWs        |
| Phe91-Phe95   | H-bond                 | Trp309-Leu328 | vdWs        |
| Phe91-Arg285  | $\pi$ -cation          | Trp309-Leu343 | H-bond      |
| Phe91-Arg285  | vdWs                   | Trp309-Val344 | vdWs        |
| Phe92-Phe95   | $\pi$ - $\pi$ stacking | Trp309-Val345 | H-bond      |
| Phe92-Phe95   | vdWs                   | Trp309-Val345 | vdWs        |
| Phe92-Ala96   | H-bond                 | Val310-Val345 | vdWs        |
| Phe92-Leu198  | vdWs                   | Val311-Val345 | H-bond      |
| Leu93-Ser97   | H-bond                 | Lys312-Trp348 | vdWs        |
| Gln94-Ser97   | H-bond                 | Asp325-Gly329 | H-bond      |
| Gln94-Ile98   | H-bond                 | Asp325-Phe330 | vdWs        |
| Phe95-Thr124  | vdWs                   | Asp325-Val333 | vdWs        |
| Ser97-Ser100  | H-bond                 | Gly329-Val333 | H-bond      |
| Ser97-Ser101  | H-bond                 | Phe330-Val333 | H-bond      |
| Ile98-Ser101  | vdWs                   | Phe330-Val333 | vdWs        |
| Ile98-Ser102  | H-bond                 | Phe330-Glu334 | H-bond      |
| Arg99-Pro128  | vdWs                   | Glu331-Glu334 | vdWs        |
| Ser101-Leu104 | H-bond                 | Glu331-Arg335 | H-bond      |

| Node-Node     | Interaction            | Node-Node     | Interaction |
|---------------|------------------------|---------------|-------------|
| Ser102-Leu105 | H-bond                 | Leu332-Met336 | H-bond      |
| Ser102-Leu105 | vdWs                   | Leu332-Met336 | vdWs        |
| Leu104-Pro107 | vdWs                   | Val333-Met336 | H-bond      |
| Leu105-Leu108 | H-bond                 | Val333-Val337 | H-bond      |
| Leu105-Leu108 | vdWs                   | Val333-Val337 | vdWs        |
| Leu105-Leu108 | vdWs                   | Glu334-Val337 | vdWs        |
| Leu105-Leu109 | H-bond                 | Glu334-Val337 | vdWs        |
| Leu105-Leu109 | vdWs                   | Glu334-Lys338 | H-bond      |
| Thr106-Leu109 | H-bond                 | Glu334-Lys338 | vdWs        |
| Thr106-Ser110 | H-bond                 | Glu334-Lys338 | vdWs        |
| Pro107-Ser111 | H-bond                 | Arg335-Lys338 | vdWs        |
| Leu109-Leu112 | vdWs                   | Arg335-Glu339 | H-bond      |
| Ser110-Leu136 | vdWs                   | Arg335-Glu339 | H-bond      |
| Ser118-Trp468 | $\pi$ -H bond          | Arg335-Glu339 | vdWs        |
| Ser118-Trp468 | vdWs                   | Met336-Lys340 | H-bond      |
| Phe119-Pro139 | H-bond                 | Met336-Val344 | vdWs        |
| Tyr121-Leu130 | vdWs                   | Asp350-Glu353 | H-bond      |
| Tyr121-His140 | $\pi$ - $\pi$ stacking | Asp350-Glu353 | H-bond      |
| Tyr121-His140 | H-bond                 | Asp350-Glu353 | vdWs        |
| Tyr121-His140 | vdWs                   | Gln351-Ile354 | H-bond      |
| Tyr121-Tyr141 | vdWs                   | Gln351-Leu355 | H-bond      |
| Tyr121-Leu143 | H-bond                 | Gln351-Ser371 | H-bond      |
| Tyr121-Leu213 | vdWs                   | Gln351-Glu374 | H-bond      |
| Asp122-Leu125 | H-bond                 | Ser352-Gly356 | H-bond      |
| Met123-Ile126 | vdWs                   | Glu353-His357 | vdWs        |
| Met123-Leu143 | H-bond                 | Ile354-His357 | H-bond      |
| Met123-Phe144 | vdWs                   | Ile354-His357 | vdWs        |
| Leu125-Pro128 | vdWs                   | Ile354-Val360 | vdWs        |
| Leu125-Leu129 | H-bond                 | Leu355-Phe378 | vdWs        |
| Leu125-Leu129 | vdWs                   | His357-Val360 | H-bond      |
| Ile126-Leu130 | H-bond                 | Phe363-Ser371 | vdWs        |
| Ile126-Asp206 | vdWs                   | Phe363-Ser371 | vdWs        |
| Leu129-Ile132 | vdWs                   | Phe363-Ala375 | vdWs        |
| Leu129-Ala133 | H-bond                 | Phe363-Pro381 | H-bond      |
| Leu130-Glu134 | H-bond                 | Phe363-Ile382 | vdWs        |
| Leu130-Lys209 | vdWs                   | Phe363-Leu383 | H-bond      |
| Pro131-Ser135 | H-bond                 | Ser365-Leu383 | H-bond      |
| Pro131-Ser135 | vdWs                   | Ser365-Trp385 | H-bond      |
| Ile132-Ser135 | H-bond                 | Ser365-Trp385 | vdWs        |

| Node-Node     | Interaction            | Node-Node     | Interaction            |
|---------------|------------------------|---------------|------------------------|
| Ala133-Leu136 | H-bond                 | His366-Trp385 | vdWs                   |
| Ala133-Leu136 | vdWs                   | His366-Gln391 | vdWs                   |
| Glu134-Gly137 | vdWs                   | Cys367-Val372 | vdWs                   |
| His140-Lys212 | vdWs                   | Cys367-Asn394 | H-bond                 |
| His140-Leu213 | vdWs                   | Cys367-Ala395 | vdWs                   |
| His140-Leu213 | vdWs                   | Cys367-Ala395 | vdWs                   |
| His140-His214 | $\pi$ - $\pi$ stacking | Gly368-Ser371 | H-bond                 |
| His140-His214 | H-bond                 | Gly368-Ser371 | vdWs                   |
| His140-His214 | vdWs                   | Gly368-Val372 | H-bond                 |
| His140-His214 | vdWs                   | Gly368-Val372 | vdWs                   |
| Tyr141-His214 | $\pi$ - $\pi$ stacking | Trp369-Val372 | H-bond                 |
| Tyr141-Gly215 | vdWs                   | Trp369-Val373 | H-bond                 |
| Tyr141-Trp468 | $\pi$ - $\pi$ stacking | Asn370-Glu374 | H-bond                 |
| Tyr141-Trp468 | H-bond                 | Ser371-Ala375 | H-bond                 |
| Tyr141-Trp468 | vdWs                   | Ser371-Ala375 | vdWs                   |
| Ile142-Gly215 | H-bond                 | Val372-Ala376 | H-bond                 |
| Ile142-Val216 | vdWs                   | Val373-Trp377 | H-bond                 |
| Ile142-Val216 | vdWs                   | Glu374-Phe378 | H-bond                 |
| Ile142-Leu217 | H-bond                 | Glu374-Phe378 | vdWs                   |
| Leu143-Leu217 | vdWs                   | Ala375-Phe378 | vdWs                   |
| Phe144-Phe151 | $\pi$ - $\pi$ stacking | Ala375-Gly379 | H-bond                 |
| Phe144-Leu217 | H-bond                 | Ala375-Val380 | H-bond                 |
| Ser146-Trp369 | vdWs                   | Ala375-Val380 | vdWs                   |
| Ser146-Asp390 | H-bond                 | Ala376-Gly379 | H-bond                 |
| Ser147-Met150 | H-bond                 | Trp377-Arg448 | $\pi$ -cation          |
| Ser147-Met150 | H-bond                 | Trp377-Arg448 | $\pi$ -cation          |
| Ser147-Met150 | vdWs                   | Trp377-Arg448 | H-bond                 |
| Ser147-Phe151 | H-bond                 | Trp377-Arg448 | vdWs                   |
| Ser147-Trp369 | vdWs                   | Trp377-Ile451 | vdWs                   |
| Ser147-Asn394 | H-bond                 | Gly379-Ala440 | vdWs                   |
| Ala148-Phe151 | vdWs                   | Gly379-Ala440 | vdWs                   |
| Ala148-Ser152 | H-bond                 | Pro381-Arg437 | vdWs                   |
| Ala148-Glu225 | H-bond                 | Ile382-Trp403 | H-bond                 |
| Thr149-Phe153 | H-bond                 | Ile382-Val405 | H-bond                 |
| Thr149-Phe153 | vdWs                   | Gly384-Val405 | H-bond                 |
| Thr149-Ser179 | vdWs                   | Gly384-Val405 | vdWs                   |
| Thr149-Ser228 | H-bond                 | Gly384-Trp406 | vdWs                   |
| Met150-Phe153 | vdWs                   | Trp385-Trp410 | $\pi$ - $\pi$ stacking |
| Met150-Phe154 | H-bond                 | Trp385-Trp410 | $\pi$ - $\pi$ stacking |

| Node-Node     | Interaction            | Node-Node     | Interaction   |
|---------------|------------------------|---------------|---------------|
| Met150-Asp390 | vdWs                   | Trp385-Trp410 | vdWs          |
| Phe151-Phe154 | $\pi$ - $\pi$ stacking | Trp385-Ile423 | vdWs          |
| Phe151-Phe154 | H-bond                 | Pro386-Gln391 | vdWs          |
| Phe151-Ala155 | H-bond                 | Pro386-Lys392 | vdWs          |
| Phe151-Leu232 | vdWs                   | Pro386-Lys392 | vdWs          |
| Ser152-Leu232 | vdWs                   | Leu387-Gln391 | H-bond        |
| Ser152-Leu232 | vdWs                   | Leu387-Glu413 | H-bond        |
| Phe153-Phe157 | $\pi$ - $\pi$ stacking | Leu387-Glu413 | vdWs          |
| Phe153-Phe157 | H-bond                 | His388-Gln391 | H-bond        |
| Phe153-Phe157 | vdWs                   | His388-Gln391 | H-bond        |
| Phe153-Leu192 | vdWs                   | His388-Gln391 | vdWs          |
| Phe154-Phe157 | H-bond                 | His388-Trp412 | vdWs          |
| Phe154-Phe203 | $\pi$ - $\pi$ stacking | Asp390-Ile393 | H-bond        |
| Phe154-Phe203 | vdWs                   | Asp390-Ile393 | vdWs          |
| Phe154-Ser207 | H-bond                 | Asp390-Ile393 | vdWs          |
| Tyr156-Leu160 | H-bond                 | Asp390-Asn394 | H-bond        |
| Tyr156-Leu160 | vdWs                   | Gln391-Asn394 | H-bond        |
| Tyr156-Ile175 | vdWs                   | Gln391-Asn394 | vdWs          |
| Phe157-Leu160 | H-bond                 | Gln391-Ala395 | H-bond        |
| Phe157-Leu160 | vdWs                   | Lys392-Glu396 | H-bond        |
| Phe157-Ala161 | H-bond                 | Lys392-Glu396 | vdWs          |
| Phe157-Phe166 | $\pi$ - $\pi$ stacking | Lys392-Gly411 | vdWs          |
| Phe157-Tyr200 | $\pi$ - $\pi$ stacking | Lys392-Trp412 | $\pi$ -cation |
| Phe157-Phe203 | $\pi$ - $\pi$ stacking | Lys392-Trp412 | vdWs          |
| Phe157-Phe203 | vdWs                   | Ile393-Glu396 | vdWs          |
| Phe157-Phe203 | vdWs                   | Ile393-Val397 | H-bond        |
| Pro158-Lys162 | vdWs                   | Ile393-Val397 | vdWs          |
| Pro158-Ser207 | vdWs                   | Asn394-Val397 | H-bond        |
| Pro158-Ser207 | vdWs                   | Asn394-Val398 | H-bond        |
| Thr159-Lys162 | vdWs                   | Ala395-Val398 | vdWs          |
| Leu160-Ser163 | H-bond                 | Ala395-Ala399 | H-bond        |
| Leu160-Phe166 | vdWs                   | Glu396-Lys400 | H-bond        |
| Leu160-Phe166 | vdWs                   | Glu396-Lys400 | vdWs          |
| Ser163-Phe166 | H-bond                 | Glu396-Lys400 | vdWs          |
| Ser165-Lys169 | H-bond                 | Glu396-Lys400 | vdWs          |
| Ser165-Lys169 | vdWs                   | Glu396-Trp406 | H-bond        |
| Ser165-Leu170 | H-bond                 | Glu396-Trp406 | vdWs          |
| Ser165-Leu170 | vdWs                   | Val398-Gly401 | H-bond        |
| Ser165-Leu170 | vdWs                   | Val398-Gly402 | H-bond        |

| Node-Node     | Interaction            | Node-Node     | Interaction |
|---------------|------------------------|---------------|-------------|
| Phe166-Leu193 | vdWs                   | Ala399-Gly402 | H-bond      |
| Phe166-Tyr200 | $\pi$ - $\pi$ stacking | Gly402-Leu436 | vdWs        |
| Pro167-Arg185 | H-bond                 | Lys407-Trp410 | H-bond      |
| Asp171-Arg185 | H-bond                 | Lys407-Trp410 | vdWs        |
| Asp171-Arg185 | vdWs                   | Lys407-Trp410 | vdWs        |
| Phe172-Pro184 | vdWs                   | Lys407-Glu429 | Ionic bond  |
| Phe172-Pro184 | vdWs                   | Lys407-Glu429 | H-bond      |
| Val173-Ile183 | H-bond                 | Gly409-Arg416 | H-bond      |
| Val173-Ile183 | H-bond                 | Gly409-Arg416 | vdWs        |
| Val173-Ile183 | vdWs                   | Trp410-Val418 | vdWs        |
| Ile175-Val178 | vdWs                   | Trp412-Glu415 | H-bond      |
| Gly177-Glu227 | vdWs                   | Trp412-Glu415 | H-bond      |
| Gly177-Ala231 | vdWs                   | Trp412-Glu415 | vdWs        |
| Ser179-Glu227 | vdWs                   | Trp412-Glu415 | vdWs        |
| Ser179-Ser228 | H-bond                 | Trp412-Glu415 | vdWs        |
| Ser179-Ser228 | H-bond                 | Arg416-Glu422 | Ionic bond  |
| Ser179-Ser228 | vdWs                   | Arg416-Glu422 | H-bond      |
| Ser179-Ser228 | vdWs                   | Arg416-Glu422 | H-bond      |
| Pro184-Ser187 | H-bond                 | Lys419-Glu422 | H-bond      |
| Pro184-Ser187 | vdWs                   | Lys419-Ile423 | H-bond      |
| Pro184-Ile188 | vdWs                   | Gly420-Ala424 | H-bond      |
| Arg185-Ile188 | H-bond                 | Glu421-Glu425 | H-bond      |
| Ser186-Lys392 | H-bond                 | Glu421-Glu425 | vdWs        |
| Ser187-Trp412 | vdWs                   | Glu421-Arg428 | H-bond      |
| Ile188-Trp412 | vdWs                   | Glu422-Ala426 | H-bond      |
| Ile188-Trp412 | vdWs                   | Glu422-Ala426 | vdWs        |
| Pro189-Leu192 | H-bond                 | Ile423-Ala426 | vdWs        |
| Pro189-Leu192 | vdWs                   | Ile423-Ile427 | H-bond      |
| Pro190-Leu193 | H-bond                 | Ala424-Ile427 | vdWs        |
| Pro191-Asp194 | H-bond                 | Ala424-Arg428 | H-bond      |
| Pro191-Asp194 | vdWs                   | Glu425-Arg428 | H-bond      |
| Pro191-Ser197 | H-bond                 | Glu425-Glu429 | H-bond      |
| Pro191-Phe199 | vdWs                   | Ala426-Glu429 | H-bond      |
| Pro191-Phe199 | vdWs                   | Ala426-Val430 | H-bond      |
| Asp194-Ser197 | H-bond                 | Ala426-Val430 | vdWs        |
| Asp194-Ser197 | vdWs                   | Ile427-Met431 | H-bond      |
| Asp194-Tyr200 | vdWs                   | Ile427-Met431 | vdWs        |
| Pro195-Tyr200 | vdWs                   | Arg428-Asn432 | H-bond      |
| Pro195-Tyr200 | vdWs                   | Arg428-Asn432 | vdWs        |

| Node-Node     | Interaction            | Node-Node     | Interaction |
|---------------|------------------------|---------------|-------------|
| Ser197-Tyr200 | vdWs                   | Val430-Asp433 | H-bond      |
| Ser197-Lys201 | H-bond                 | Val430-Asp433 | vdWs        |
| Ser197-Lys201 | vdWs                   | Met431-Arg437 | H-bond      |
| Leu198-Lys201 | H-bond                 | Asp433-Leu436 | vdWs        |
| Leu198-Lys201 | vdWs                   | Glu434-Arg437 | vdWs        |
| Leu198-Lys201 | vdWs                   | Glu434-Arg437 | vdWs        |
| Leu198-Leu202 | H-bond                 | Glu434-Met438 | H-bond      |
| Leu198-Leu202 | vdWs                   | Ser435-Met438 | vdWs        |
| Phe199-Phe203 | $\pi$ - $\pi$ stacking | Ser435-Lys439 | H-bond      |
| Phe199-Phe203 | H-bond                 | Ser435-Lys439 | vdWs        |
| Phe199-Phe203 | vdWs                   | Leu436-Lys439 | vdWs        |
| Tyr200-Met204 | H-bond                 | Leu436-Ala440 | H-bond      |
| Tyr200-Met204 | vdWs                   | Met438-Gln442 | H-bond      |
| Lys201-Glu205 | H-bond                 | Lys439-Gln442 | H-bond      |
| Leu202-Asp206 | H-bond                 | Lys439-Val443 | H-bond      |
| Phe203-Asp206 | H-bond                 | Ala440-Val443 | vdWs        |
| Phe203-Ser207 | H-bond                 | Ala440-Lys444 | H-bond      |
| Phe203-Ser207 | vdWs                   | Thr441-Lys445 | H-bond      |
| Met204-Pro208 | vdWs                   | Gln442-Lys445 | H-bond      |
| Glu205-Lys209 | Ionic bond             | Gln442-Lys445 | vdWs        |
| Glu205-Lys209 | H-bond                 | Gln442-Asp446 | H-bond      |
| Asp206-Lys209 | H-bond                 | Gln442-Asp446 | vdWs        |
| Ser207-Leu210 | H-bond                 | Val443-Asp446 | H-bond      |
| Pro208-Lys211 | vdWs                   | Val443-Ala447 | H-bond      |
| Lys209-Lys212 | H-bond                 | Lys444-Ala447 | H-bond      |
| Leu210-Leu213 | H-bond                 | Lys444-Arg448 | H-bond      |
| Leu210-Leu213 | vdWs                   | Lys445-Arg448 | vdWs        |
| Lys211-Gly240 | vdWs                   | Lys445-Lys449 | H-bond      |
| His214-Pro243 | vdWs                   | Lys445-Lys449 | vdWs        |
| Val216-Pro243 | H-bond                 | Lys445-Lys449 | vdWs        |
| Val218-Tyr245 | H-bond                 | Asp446-Ala450 | H-bond      |
| Val218-Val247 | H-bond                 | Ala447-Ala450 | H-bond      |
| Val218-Val247 | vdWs                   | Arg448-Ser452 | H-bond      |
| Asn219-Phe250 | H-bond                 | Lys449-Ser452 | H-bond      |
| Asn219-Phe250 | vdWs                   | Ala450-Gln457 | H-bond      |
| Asn219-Trp369 | H-bond                 | Ser452-Gly455 | H-bond      |
| Asn219-Trp369 | vdWs                   | Ser452-Gly455 | vdWs        |
| Asn219-Val373 | vdWs                   | Gly454-Glu458 | H-bond      |
| Thr220-Glu225 | vdWs                   | Gly455-Val459 | H-bond      |

| Node-Node     | Interaction | Node-Node     | Interaction |
|---------------|-------------|---------------|-------------|
| Thr220-Leu229 | vdWs        | Ser456-Ala460 | H-bond      |
| Thr220-Gly248 | H-bond      | Gln457-Ala460 | vdWs        |
| Phe221-Ile224 | H-bond      | Gln457-Leu461 | H-bond      |
| Phe221-Ile224 | vdWs        | Gln457-Leu461 | vdWs        |
| Phe221-Glu225 | H-bond      | Glu458-Gln462 | H-bond      |
| Phe221-Glu225 | vdWs        | Val459-Lys463 | H-bond      |
| Phe221-Gly248 | vdWs        | Ala460-Leu464 | H-bond      |
| Phe221-Pro249 | vdWs        | Ala460-Leu464 | vdWs        |
| Glu222-Lys226 | H-bond      | Leu461-Leu464 | H-bond      |
| Glu222-Lys226 | vdWs        | Leu461-Met465 | H-bond      |
| Glu225-Leu229 | H-bond      | Gln462-Glu466 | H-bond      |
| Lys226-Leu229 | vdWs        | Gln462-Glu466 | vdWs        |
| Lys226-Glu230 | Ionic bond  | Leu464-Val467 | H-bond      |
| Lys226-Glu230 | H-bond      | Met465-Trp468 | vdWs        |
| Lys226-Glu230 | vdWs        | Met465-Lys469 | H-bond      |
| Glu227-Ala231 | H-bond      |               |             |

**Table S16** The number of interactions between different edge types of WT and Mut10 based on overall network.

| Interaction            | WT  | Mut10 |
|------------------------|-----|-------|
| H-bond                 | 275 | 342   |
| $\pi$ - $\pi$ stacking | 19  | 23    |
| $\pi$ -cation          | 1   | 4     |
| Ionic bond             | 7   | 7     |
| $\pi$ -H bond          | 3   | 3     |
| vdWs                   | 312 | 352   |
| Total number           | 617 | 731   |

**Table S17** List of primers for constructing mutants.

| Primer  | Sequence (5' to 3')                        |
|---------|--------------------------------------------|
| T49V-F  | GACCCTGATTGTGCCGCAGCCGACCGTGAG             |
| T49V-R  | TCGGCTGCGGCACAATCAGGGTCACATGGCAATGCTG      |
| T53P-F  | GCAGCCGCCGGTGAGCAAAGCGGAAGAAGATCTGCTGA     |
| T53P-R  | TTGCTCACCGGCGGCTGCGGGGTAATCAGGGT           |
| S110L-F | TGCTGCTGAGCCTGACCCCGCCGCTGAGCAGCTTTATTTATG |
| S110L-R | GGTCAGGCTCAGCAGCAGCGGGGTCAGCAGATGGCTA      |
| S179F-F | TCCGGGCGTGTTTGTGAGCAGCATTCCACGCAG          |
| S179F-R | ATGCTGCTCACAAACACGCCCGGAATTTCCACAAAATC     |
| G200W-F | CCTGTTTTGGAAACTGTTTATGGAAGATAGCCCGA        |
| G200W-R | AACAGTTTCCAAAACAGGCTGTTCGGCACC             |
| S207A-F | ATGGAAGATGCGCCGAAACTGAAAAAACTGCATGGTGTGCT  |
| S207A-R | TTCGGCGCATCTTCCATAAACAGTTTGCCAAACAGGCT     |
| G246P-F | GGTGTATCCGGTGGGCCCGTTTGTGCCGTGCGAATTTG     |
| G246P-R | ACGGGCCACCGGATACACCGGCGGCAGGCCTTTAACCCT    |
| V333W-F | CGAACTGTGGGAACGCATGGTGAAAGAAAAAAAAAGGCCTG  |
| V333W-R | ATGCGTTCCACAGTTCGAAGCCTAACACGCCGTCCA       |
| Q51I-F  | TACCCCGATTCCGACCGTGAGCAAAGC                |
| Q51I-R  | ACGGTCGGAATCGGGGTAATCAGGGTCACA             |
| S274P-F | AACAGCCGCCGGGCAGCGTGGTGTATGTGAG            |
| S274P-R | ACGCTGCCCCGGCGGCTGTTTCATCCAGCCATTC         |
| C253F-F | GTGCCGTTTGAATTTGAAAAAGTGGTGAAACGCGGCGA     |
| C253F-R | CTTTTTCAAATTCAAACGGCACAAACGGGCCAC          |
| F330P-F | GTTAGGCCCGGAACTGGTGGAAACGCATGGT            |
| F330P-R | ACCAGTTCCGGGCCTAACACGCCGTCCA               |
| G200Y-F | CCTGTTTTATAAACTGTTTATGGAAGATAGCCCGA        |
| G200Y-R | AACAGTTTATAAAACAGGCTGTTCGGCACC             |
| G200T-F | CCTGTTTACGAAACTGTTTATGGAAGATAGCCCGA        |
| G200T-R | AACAGTTTCGTAAACAGGCTGTTCGGCACC             |
| T106H-F | TCTGCTGCATCCGCTGCTGAGCAGCCTGAC             |
| T106H-R | AGCAGCGGATGCAGCAGATGGCTACTGCTGCGA          |
| E339K-F | GGTGAAAAAGAAAAAGGCCTGGTGGTTAAAGAATGG       |
| E339K-R | CCTTTTTTCTTTTTCACCATGCGTTCACCAG            |
| E339L-F | GGTGAAACTGAAAAAAGGCCTGGTGGTTAAAGAATGG      |
| E339L-R | CCTTTTTTTCAGTTTTCACCATGCGTTCACCAG          |
| V467M-F | TGATGGAAATGTGGAAAAAAACGTGCTCGAGCACC        |
| V467M-R | CGTTTTTTTTCCACATTTCCATCAGTTTCTGCAGCGCCA    |
| V467S-F | TGATGGAAAGCTGGAAAAAAACGTGCTCGAGCACC        |
| V467S-R | CGTTTTTTTTCCAGCTTTCCATCAGTTTCTGCAGCGCCA    |

| Primer  | Sequence (5' to 3')                       |
|---------|-------------------------------------------|
| V333L-F | CGAACTGCTGGAACGCATGGTGAAGAAAAAAGGCCTG     |
| V333L-R | ATGCGTTCCAGCAGTTCGAAGCCTAACACGCCGTCCA     |
| G246C-F | GGTGTATTGCGTGGGCCCGTTTGTGCCGTGCGAATTTG    |
| G246C-R | ACGGGCCACGCAATACACCGGCGGCAGGCCTTTAACCCT   |
| V194D-F | CACTGCTGGATCCGAACAGCCTGTTTGGCAAACCT       |
| V194D-R | TGTTCCGATCCAGCAGTGGCGGCGGAA               |
| V194N-F | CACTGCTGAATCCGAACAGCCTGTTTGGCAAACCT       |
| V194N-R | TGTTCCGATCCAGCAGTGGCGGCGGAA               |
| V437R-F | AGCCTGCGCATGAAAGCGACCCAAGTAAAAAAGAT       |
| V437R-R | TCGCTTTCATGCGCAGGCTTTCATCGTTCATCACTTCG    |
| S100R-F | GCATTCGCCCGAGTAGCCATCTGCTGACCCCGCT        |
| S100R-R | TGGCTACTGCGGCGAATGCTCGCAAACCTGCAGAAAAACG  |
| L227E-F | GCATTGAAAAAGAGAGCCTGGAAGCGCTGAACG         |
| L227E-R | CAGGCTCTCTTTTTCAATGCCTTCAAAGGTGTTCAACAGC  |
| L227R-F | GCATTGAAAAACGGAGCCTGGAAGCGCTGAACG         |
| L227R-R | CAGGCTCCGTTTTTCAATGCCTTCAAAGGTGTTCAACAGC  |
| K445E-F | GCAAAGAAATTAGCGTGGGCGGTGGCT               |
| K445E-R | CCACGCTAATTTCTTTGCGCGCATCTTTTTTCACTTGGGTC |
| K381P-F | TGGCGTGCCAATTCTGGGCTGGCCGCTGCAT           |
| K381P-R | AGCCCAGAATTGGCACGCCAAACCACGCCGCT          |
| G289S-F | ACCGCGATGAGCCGGAACAGCTGCGCGAAGT           |
| G289S-R | TTCGCGGCTCATCGCGGTGCGGCTGCCAAAG           |
| D446E-F | GACCCAAGTAAAAAAGAAGCGCGCAAAGCGATTAGC      |
| D446E-R | TTGCGCGCTTCTTTTTTCACTTGGGTCGCTTTCATCACC   |
| M438E-F | GAAAGCCTGGTGGAAAAAGCGACCCAAGTAAAAAAGATG   |
| M438E-R | GGTCGCTTTTTCCACCAGGCTTTCATCGTTCATCAC      |
| E59S-F  | CAAAGCGGAAAGCGATCTGCTGAGCCGCTTTCTG        |
| E59S-R  | AGCAGATCGCTTCCGCTTTGCTCACGGTC             |
| H214D-F | GAAAAAACTGGATGGTGTGCTGGTGAACACCTT         |
| H214D-R | CACACCATCCAGTTTTTTCAGTTTCGGGCTATCTTCCA    |
| H140C-F | TGCCGTGCTATATTCTGTTTACGAGCAGCGCGACCATG    |
| H140C-R | AACAGAATATAGCACGGCACGCCAGGCTT             |
| V296L-F | TGCGCGAACTGGGCGATGGCCTGGTGAAGCGGCT        |
| V296L-R | ATCGCCCAGTTCGCGCAGCTGTTTCGCGGCCCA         |
| V296I-F | TGCGCGAAATTGGCGATGGCCTGGTGAAGCGGCT        |
| V296I-R | ATCGCCAATTTTCGCGCAGCTGTTTCGCGGCCCA        |
| T106Y-F | AGTAGCCATCTGCTGTATCCGCTGCTGAGCA           |
| T106Y-R | GATACAGCAGATGGCTACTGCTGCGAATGCTCG         |
| T106A-F | CATCTGCTGGCGCCGCTGCTGAGCAGCCT             |

| Primer  | Sequence (5' to 3')                     |
|---------|-----------------------------------------|
| T106A-R | AGCGGCGCCAGCAGATGGCTACTGCTGCGAATG       |
| D411G-F | GAAAGAAGGCTGGGGCTGGGAAGGCGAA            |
| D411G-R | AGCCCCAGCCTTCTTTCCACACGCCCCA            |
| S118A-F | GAGCGGTTTTATTTATGATATGACGCTGATTAGCCCGCT |
| S118A-R | CATAAATAAACGCGCTCAGCGGCGGGTCA           |
| G456S-F | TGGGCGGTAGCTGCGAAGTGGCGCTGCA            |
| G456S-R | TCGCAGCTACCGCCCACGCTAATCGCT             |
| H140T-F | TGCCGACCTATATTCTGTTTACGAGCAGCGCGA       |
| H140T-R | CAGAATATAGGTCGGCACGCCAGGCTTTC           |
| Q51V-F  | TACCCCGGTGCCGACCGTGAGCAAAGCGGAAG        |
| Q51V-R  | ACGGTCGGCACCGGGTAATCAGGGTCACATGGCA      |
| E415V-F | TTGGGAAGGCGTGCGCCTGGTCAAAGGCGAAGAAATTG  |
| E415V-R | AGGCGCACGCCTTCCAATCCCAGCCTTC            |
| K211P-F | CGAAACTGCCGAAACTGCATGGTGTGCTGGT         |
| K211P-R | GCAGTTTCGGCAGTTTCGGGCTATCTTCCATAAACAGT  |
| K346N-F | CTGGTGGTTAACGAATGGGTGGATCAGAGCGAA       |
| K346N-R | CACCCATTCGTTAACCACCAGGCCTTTTTTTTCTTTC   |
| V180P-F | CGTGAGCCCGAGCAGCATTCCACGCAGCA           |
| V180P-R | ATGCTGCTCGGGCTCACGCCGGAATTTCCA          |
| V259P-F | TGAAAAAGTGCCGAAACGCGGCGAAACCATTAGC      |
| V259P-R | CGTTTCGGCACTTTTTCAAATTCGCACGGCAC        |
| C457Q-F | GGTGGCCAAGAAGTGGCGCTGCAGAAACT           |
| C457Q-R | CCACTTCTTGCCACCGCCCACGCTAATC            |
| V459Q-F | TGGCTGCGAACAAGCGCTGCAGAAACTGATGGAAGTGT  |
| V459Q-R | CAGCGCTTGTTTCGCAGCCACCGCCCACGCTAATC     |
| E458K-F | GTGGCTGCAAAGTGGCGCTGCAGAAACTGATGGA      |
| E458K-R | AGCGCCACTTTGCAGCCACCGCCCACGCTAATC       |
| G424A-F | AGAAATTGCGGAAGCGATTTCGCGAAGTGATGA       |
| G424A-R | ATCGCTTCCGCAATTTCTTCGCCTTTCACCAGG       |
| S97A-F  | GTTTGCGGCGATTTCGCAGCAGTAGCCATCTG        |
| S97A-R  | GCTGCGAATCGCCGCAAACCTGCAGAAAAAACGGAT    |
| F172V-F | GCAAACCTGGATGTGGTGGAAATTCCGGGCGTGAG     |
| F172V-R | TTCCACCACATCCAGTTTGCCCCGAAAGCT          |
| S163D-F | CTGGCGAAAGATGAAAGCTTTCGGGCAAACCTG       |
| S163D-R | AAGCTTTCATCTTTCGCCAGGGTCGAAAATAGC       |
| L227E-F | GGCATTGAAAAAGAAAGCCTGGAAGCGCTGAACG      |
| L227E-R | AGGCTTCTTTTTCAATGCCTTCAAAGGTGTTACCAGC   |
| F330E-F | GTGTTAGGCGAAGAAGTGGTGGAAACGCATGGT       |
| F330E-R | CAGTTCTTCGCCTAACACGCCGTCCAG             |

| Primer  | Sequence (5' to 3')                     |
|---------|-----------------------------------------|
| T264A-F | CGAAGCGATTAGCGAATGGCTGGATGAACAGCCGA     |
| T264A-R | TTCGCTAATCGCTTCGCCGCGTTTCACCACTTTTTCAA  |
| D313A-F | GGTGAAAGCGAAAATTGTGGATCGCGCGGAAGAG      |
| D313A-R | CAATTTTCGCTTTCACCACCCACAGAAAGCGCCA      |
| S155A-F | GTTTAGCTTTTTTTCGCTATTTTCCGACCCTGGCGAA   |
| S155A-R | TACGCAAAAAAGCTAAACATGGTCGCGCT           |
| S274A-F | GAACAGCCGGCGGGCAGCGTGGTGTATGTGA         |
| S274A-R | CTGCCC GCCGGCTGTTTCATCCAGCCAT           |
| H40E-F  | GTTACTGGAACAGCATTGCCATGTGACCCT          |
| H40E-R  | CAATGCTGTTCCAGTAACAGGCTCGCCAGG          |
| S22N-F  | TGTTACCGAACGCCGGCATGGGCCAT              |
| S22N-R  | TGCCGGCGTTCGGTAACAGCGCCACATGC           |
| S36A-F  | TGGCGGCGCTGTTACTGCATCAGCATTGCCAT        |
| S36A-R  | GCAGTAACAGCGCCGCCAGGCGCAGAAAC           |
| D446S-F | GAAAAAAGCGCGCGCAAAGCGATTAGCGT           |
| D446S-R | TGCGCGCGCTTTTTTTCCTTGGGTCGCTTTCATCACC   |
| L129M-F | AGCCCGATGCTGCCGATTGCGGAAAGC             |
| L129M-R | TCGGCAGCATCGGGCTAATCAGCGTCATATCAT       |
| L104N-F | GTAGCCATAACCTGACCCCGCTGCTGAGCA          |
| L104N-R | GGTCAGGTTATGGCTACTGCTGCGAATGCTCG        |
| S181D-F | GTGAGCGTGGATAGCATTCCACGCAGCAGCAT        |
| S181D-R | ATGCTATCCACGCTCACGCCCGGAATTC            |
| R290K-F | ATGGGCAAAGAACAGCTGCGCGAAGTGG            |
| R290K-R | AGCTGTTCTTTGCCCATCGCGGTGC               |
| S187C-F | CCACGCAGCTGCATTCCGCCGCCACTGCT           |
| S187C-R | GGAATGCAGCTGCGTGGAATGCTGCTCACGCT        |
| T441S-F | ATGAAAGCGAGCCAAGTGAAAAAAGATGCGCGCAAAG   |
| T441S-R | ACTTGGCTCGCTTTCATCACCAGGCTTTCAT         |
| E267K-F | CCATTAGCAAATGGCTGGATGAACAGCCGAG         |
| E267K-R | CAGCCATTTGCTAATGGTTTCGCCGCGTT           |
| S165D-F | GAAAAGCGAAGATTTTCCGGGCAAACCTGGATTTTGTGG |
| S165D-R | GAAAATCTTCGCTTTTCGCCAGGGTCG             |
| S111N-F | TGCTGAGCAACCTGACCCCGCCGCTGAGCAGCTT      |
| S111N-R | GGTCAGGTTGCTCAGCAGCGGGGTCAGCAGA         |
| S102A-F | CAGCAGTGCGCATCTGCTGACCCCGCTG            |
| S102A-R | GCAGATGCGCACTGCTGCGAATGCTCGCA           |
| K201S-F | TTGGCAGCCTGTTTATGGAAGATAGCCCGAAACTGA    |
| K201S-R | CATAAACAGGCTGCCAAACAGGCTGTTTCGG         |
| T106L-F | ATCTGCTGCTGCCGCTGCTGAGCAGCCTGA          |

---

| Primer  | Sequence (5' to 3')                   |
|---------|---------------------------------------|
| T106L-R | CAGCGGCAGCAGCAGATGGCTACTGCTGCGA       |
| C43N-F  | TCAGCATAACCATGTGACCCTGATTACCCCGCA     |
| C43N-R  | TCACATGGTTATGCTGATGCAGTAACAGGCTCG     |
| V238T-F | GCAAAGTGACCAAAGGCCTGCCGCCGGT          |
| V238T-R | CCTTTGGTCACTTTGCCGCCGTTTCAGCGCT       |
| E353L-F | TCAGAGCCTGATTCTGGGCCATAAAGCGGTG       |
| E353L-R | CCAGAATCAGGCTCTGATCCACCCATTCTTTAACCAC |

---
